# Supplementary material for: Re-investigating the structure–property relationship of the solid electrolytes Li 3− x In 1− x Zr x Cl 6 and the impact of In–Zr( iv ) substitution
Source: Royal Society of Chemistry journal article supplement (doi:10.1039/d2ta08433c), 2023-01-01
Supplement: d2ta08433c2.pdf [file d2ta08433c2.pdf]

## RelaxIS 3.0.20.16 - Report

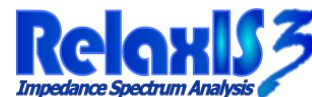

Datasource: 50C\_2.5\_1

Circuit: I-R-P

| Type             | Value     |
|------------------|-----------|
| Temperature:     | 50,000000 |
| Free variable:   | 0,5000000 |
| DC Voltage:      | N/A       |
| AC Voltage:      | N/A       |
| Time:            | 46,430562 |
| Harmonic:        | N/A       |
| Free Variable 2: | N/A       |
| Area:            | N/A       |
| Thickness:       | N/A       |

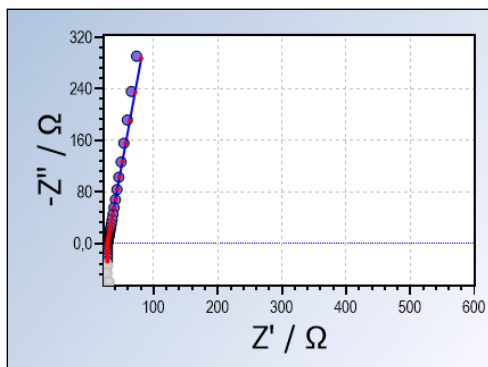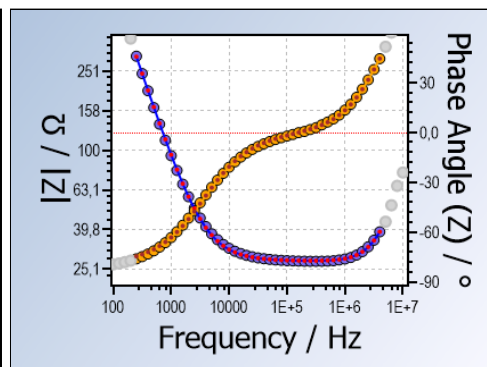

### FIT PARAMETERS:

| Fix? | Name         | Value     | Error (Relative)        |
|------|--------------|-----------|-------------------------|
|      | Inductance 1 | 1,10E-006 | 7,04E-009 (0,6421160 %) |
|      | Resistance 1 | 27,575348 | 0,0474837 (0,1721960 %) |
|      | CPE Q 1      | 5,09E-006 | 6,55E-008 (1,2852221 %) |
|      | CPE Alpha 1  | 0,8840629 | 0,0014415 (0,1630597 %) |

## RelaxIS 3.0.20.16 - Report

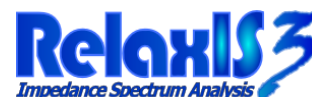

Datasource: 50C\_2.6\_1

Circuit: I-R-P

| Type             | Value     |
|------------------|-----------|
| Temperature:     | 50,000000 |
| Free variable:   | 0,4000000 |
| DC Voltage:      | N/A       |
| AC Voltage:      | N/A       |
| Time:            | 46,279985 |
| Harmonic:        | N/A       |
| Free Variable 2: | N/A       |
| Area:            | N/A       |
| Thickness:       | N/A       |

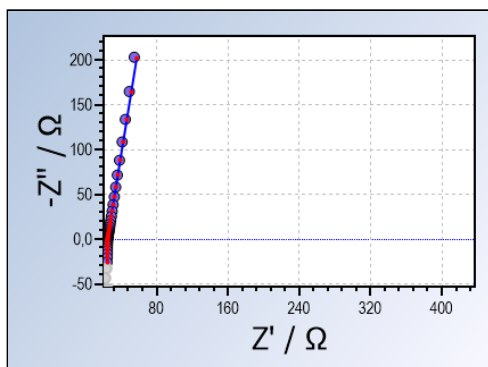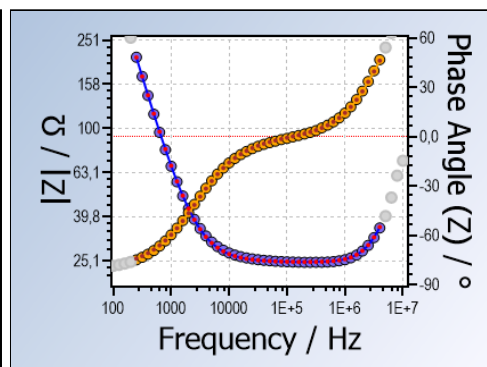

### FIT PARAMETERS:

| Fix? | Name         | Value     | Error (Relative)        |
|------|--------------|-----------|-------------------------|
|      | Inductance 1 | 1,03E-006 | 4,60E-009 (0,4455372 %) |
|      | Resistance 1 | 24,717289 | 0,0300316 (0,1215002 %) |
|      | CPE Q 1      | 6,60E-006 | 6,54E-008 (0,9904691 %) |
|      | CPE Alpha 1  | 0,8972797 | 0,0011272 (0,1256254 %) |

## RelaxIS 3.0.20.16 - Report

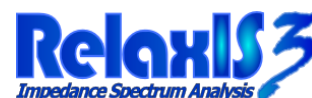

Datasource: 50C\_2.7\_1

Circuit: I-R-P

| Type           | Value     |
|----------------|-----------|
| Temperature:   | 50,000000 |
| Free variable: | 0,3000000 |

|                  |           |
|------------------|-----------|
| DC Voltage:      | N/A       |
| AC Voltage:      | N/A       |
| Time:            | 46,569165 |
| Harmonic:        | N/A       |
| Free Variable 2: | N/A       |
| Area:            | N/A       |
| Thickness:       | N/A       |

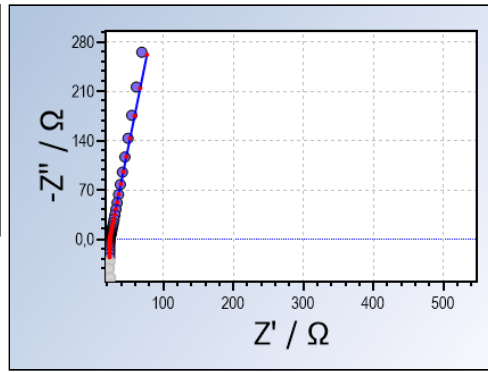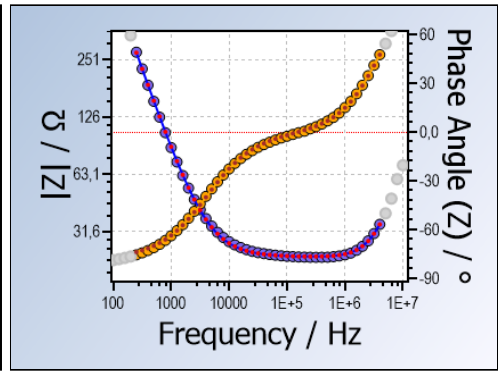

**FIT PARAMETERS:**

| Fix? | Name         | Value     | Error (Relative)        |
|------|--------------|-----------|-------------------------|
|      | Inductance 1 | 1,02E-006 | 7,45E-009 (0,7312372 %) |
|      | Resistance 1 | 23,218833 | 0,0496692 (0,2139179 %) |
|      | CPE Q 1      | 6,06E-006 | 9,28E-008 (1,5312715 %) |
|      | CPE Alpha 1  | 0,8723153 | 0,0017075 (0,1957383 %) |

**RelaxIS 3.0.20.16 - Report**

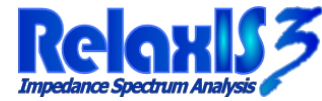

Datasource: 50C\_2.8\_1

Circuit: I-R-P

|                  |           |
|------------------|-----------|
| Type             | Value     |
| Temperature:     | 50,000000 |
| Free variable:   | 0,2000000 |
| DC Voltage:      | N/A       |
| AC Voltage:      | N/A       |
| Time:            | 46,580261 |
| Harmonic:        | N/A       |
| Free Variable 2: | N/A       |
| Area:            | N/A       |
| Thickness:       | N/A       |

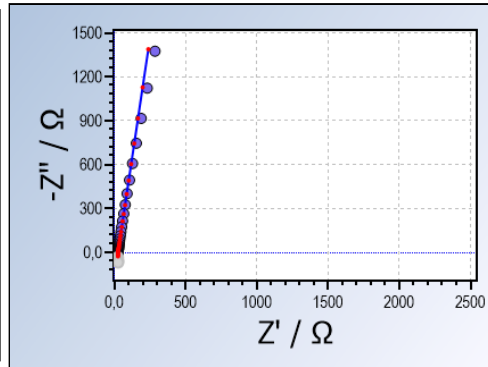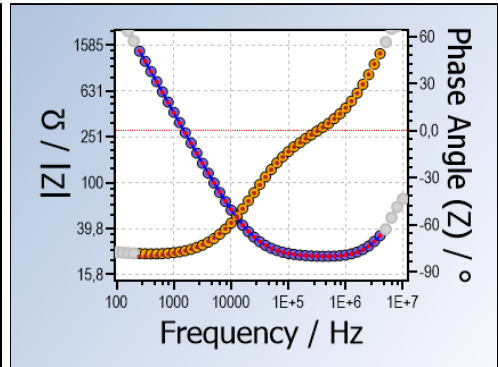

**FIT PARAMETERS:**

| Fix? | Name         | Value     | Error (Relative)        |
|------|--------------|-----------|-------------------------|
|      | Inductance 1 | 1,06E-006 | 5,46E-009 (0,5161454 %) |
|      | Resistance 1 | 22,565144 | 0,0407126 (0,1804224 %) |
|      | CPE Q 1      | 9,21E-007 | 7,56E-009 (0,8205577 %) |
|      | CPE Alpha 1  | 0,9029763 | 0,0008340 (0,0923633 %) |

**RelaxIS 3.0.20.16 - Report**

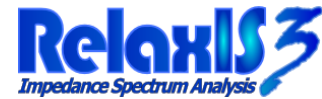

Datasource: 50C\_2.9\_1

Circuit: I-R-P

|                  |           |
|------------------|-----------|
| Type             | Value     |
| Temperature:     | 50,000000 |
| Free variable:   | 0,1000000 |
| DC Voltage:      | N/A       |
| AC Voltage:      | N/A       |
| Time:            | 46,486397 |
| Harmonic:        | N/A       |
| Free Variable 2: | N/A       |
| Area:            | N/A       |
| Thickness:       | N/A       |

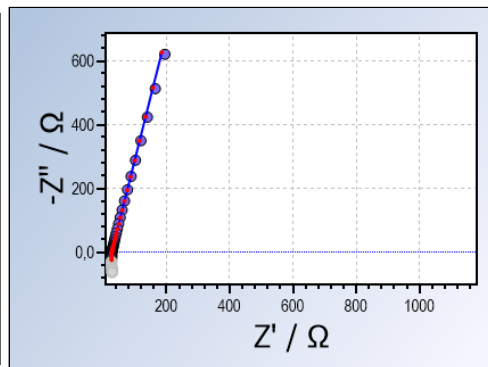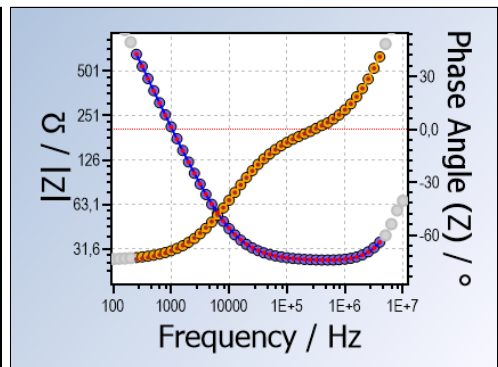

**FIT PARAMETERS:**

| Fix? | Name         | Value     | Error (Relative)        |
|------|--------------|-----------|-------------------------|
|      | Inductance 1 | 9,37E-007 | 3,41E-009 (0,3641185 %) |
|      | Resistance 1 | 26,328812 | 0,0262509 (0,0997041 %) |
|      | CPE Q 1      | 3,12E-006 | 1,72E-008 (0,5517557 %) |
|      | CPE Alpha 1  | 0,8424853 | 0,0005860 (0,0695516 %) |

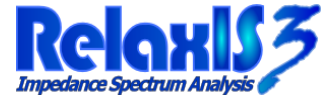

**RelaxIS 3.0.20.16 - Report**

Datasource: 50C\_3.0\_1

Circuit: I-R-P

| Type             | Value     |
|------------------|-----------|
| Temperature:     | 50,000000 |
| Free variable:   | 0,0       |
| DC Voltage:      | N/A       |
| AC Voltage:      | N/A       |
| Time:            | 46,483267 |
| Harmonic:        | N/A       |
| Free Variable 2: | N/A       |
| Area:            | N/A       |
| Thickness:       | N/A       |

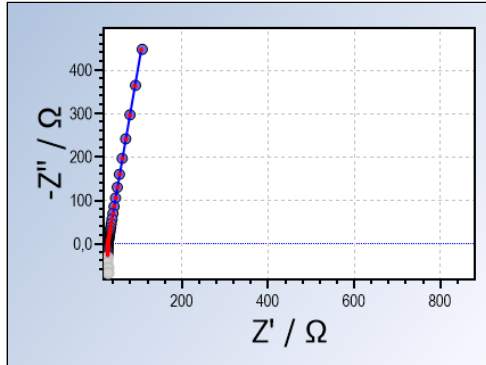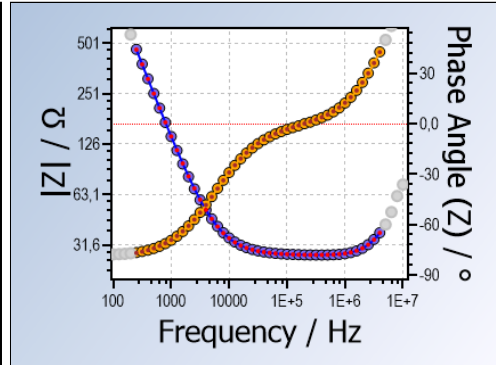

**FIT PARAMETERS:**

| Fix? | Name         | Value     | Error (Relative)        |
|------|--------------|-----------|-------------------------|
|      | Inductance 1 | 1,02E-006 | 2,52E-009 (0,2485828 %) |
|      | Resistance 1 | 27,417958 | 0,0178738 (0,0651902 %) |
|      | CPE Q 1      | 3,13E-006 | 1,34E-008 (0,4286441 %) |
|      | CPE Alpha 1  | 0,8905184 | 0,0004688 (0,0526419 %) |

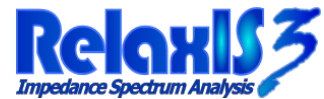

**RelaxIS 3.0.20.16 - Report**

Datasource: 60C\_2.5\_1

Circuit: I-R-P

| Type             | Value     |
|------------------|-----------|
| Temperature:     | 60,000000 |
| Free variable:   | 0,5000000 |
| DC Voltage:      | N/A       |
| AC Voltage:      | N/A       |
| Time:            | 46,529814 |
| Harmonic:        | N/A       |
| Free Variable 2: | N/A       |
| Area:            | N/A       |
| Thickness:       | N/A       |

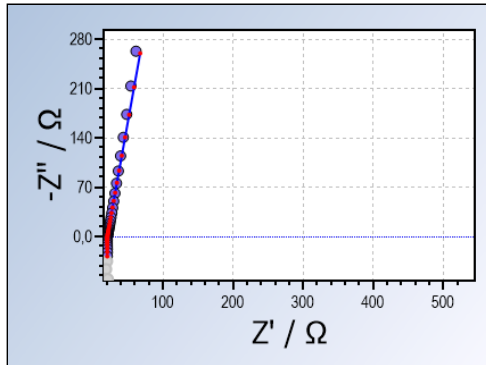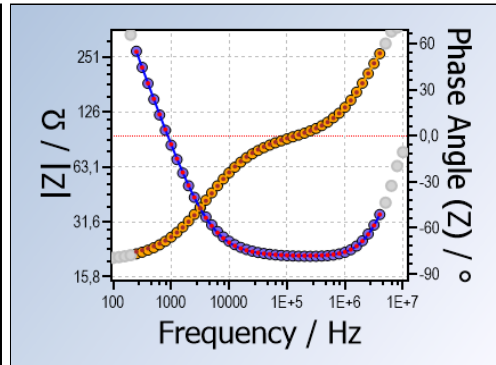

**FIT PARAMETERS:**

| Fix? | Name         | Value     | Error (Relative)        |
|------|--------------|-----------|-------------------------|
|      | Inductance 1 | 1,12E-006 | 5,93E-009 (0,5301031 %) |
|      | Resistance 1 | 20,522551 | 0,0367478 (0,1790607 %) |
|      | CPE Q 1      | 5,54E-006 | 6,87E-008 (1,2402096 %) |
|      | CPE Alpha 1  | 0,8862980 | 0,0013765 (0,1553119 %) |

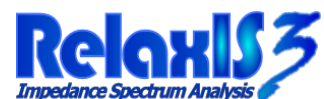

**RelaxIS 3.0.20.16 - Report**

Datasource: 60C\_2.6\_1

Circuit: I-R-P

| Type             | Value     |
|------------------|-----------|
| Temperature:     | 60,000000 |
| Free variable:   | 0,4000000 |
| DC Voltage:      | N/A       |
| AC Voltage:      | N/A       |
| Time:            | 46,464563 |
| Harmonic:        | N/A       |
| Free Variable 2: | N/A       |
| Area:            | N/A       |
| Thickness:       | N/A       |

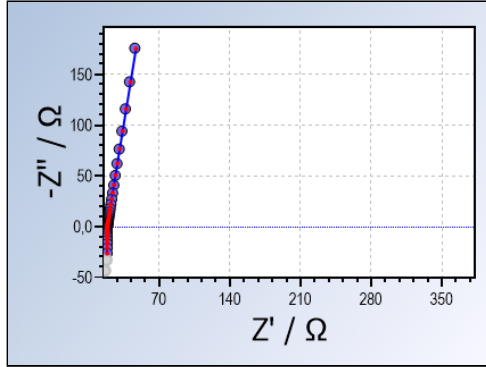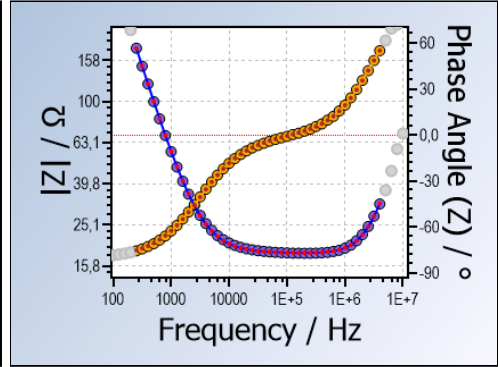

**FIT PARAMETERS:**

| Fix? | Name         | Value     | Error (Relative)        |
|------|--------------|-----------|-------------------------|
|      | Inductance 1 | 1,05E-006 | 2,72E-009 (0,2601292 %) |
|      | Resistance 1 | 18,265904 | 0,0161445 (0,0883857 %) |
|      | CPE Q 1      | 7,60E-006 | 5,11E-008 (0,6724827 %) |
|      | CPE Alpha 1  | 0,8971356 | 0,0007586 (0,0845581 %) |

**RelaxIS 3.0.20.16 - Report**

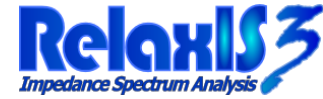

Datasource: 60C\_2.7\_1

Circuit: I-R-P

| Type             | Value     |
|------------------|-----------|
| Temperature:     | 60,000000 |
| Free variable:   | 0,3000000 |
| DC Voltage:      | N/A       |
| AC Voltage:      | N/A       |
| Time:            | 46,024976 |
| Harmonic:        | N/A       |
| Free Variable 2: | N/A       |
| Area:            | N/A       |
| Thickness:       | N/A       |

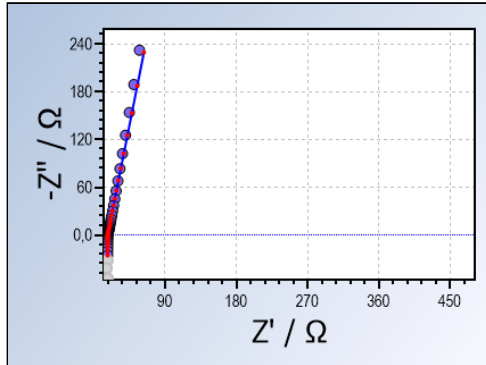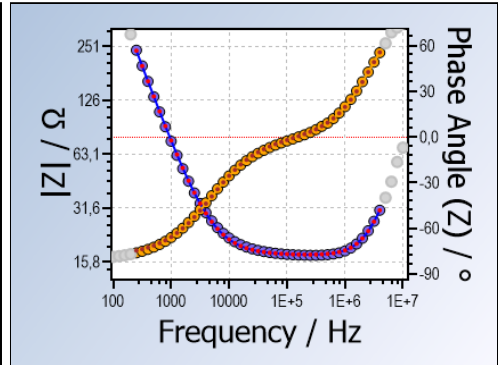

**FIT PARAMETERS:**

| Fix? | Name         | Value     | Error (Relative)        |
|------|--------------|-----------|-------------------------|
|      | Inductance 1 | 1,02E-006 | 5,91E-009 (0,5799018 %) |
|      | Resistance 1 | 17,287058 | 0,0360573 (0,2085798 %) |
|      | CPE Q 1      | 6,83E-006 | 9,56E-008 (1,4000171 %) |
|      | CPE Alpha 1  | 0,8743751 | 0,0015477 (0,1770023 %) |

**RelaxIS 3.0.20.16 - Report**

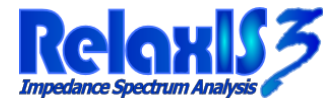

Datasource: 60C\_2.8\_1

Circuit: I-R-P

| Type           | Value     |
|----------------|-----------|
| Temperature:   | 60,000000 |
| Free variable: | 0,2000000 |
| DC Voltage:    | N/A       |
| AC Voltage:    | N/A       |
| Time:          | 46,100427 |
| Harmonic:      | N/A       |
| Free Variable  | N/A       |

2:  
 Area: N/A  
 Thickness: N/A

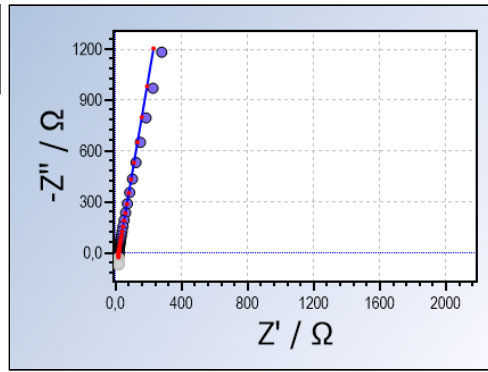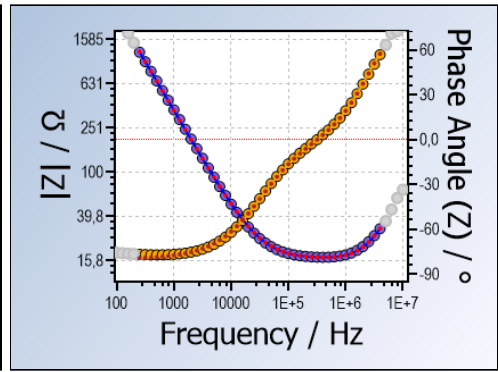

**FIT PARAMETERS:**

| Fix? | Name         | Value     | Error (Relative)        |
|------|--------------|-----------|-------------------------|
|      | Inductance 1 | 1,05E-006 | 6,40E-009 (0,6108628 %) |
|      | Resistance 1 | 16,609563 | 0,0446261 (0,2686771 %) |
|      | CPE Q 1      | 1,17E-006 | 1,31E-008 (1,1162578 %) |
|      | CPE Alpha 1  | 0,8891532 | 0,0011216 (0,1261428 %) |

**RelaxIS 3.0.20.16 - Report**



Datasource: 60C\_2.9\_1

Circuit: I-R-P

| Type             | Value     |
|------------------|-----------|
| Temperature:     | 60,000000 |
| Free variable:   | 0,1000000 |
| DC Voltage:      | N/A       |
| AC Voltage:      | N/A       |
| Time:            | 46,083958 |
| Harmonic:        | N/A       |
| Free Variable 2: | N/A       |
| Area:            | N/A       |
| Thickness:       | N/A       |

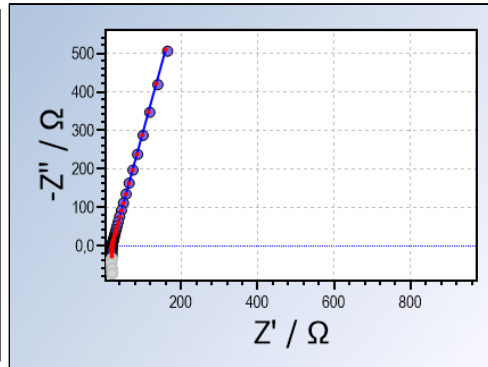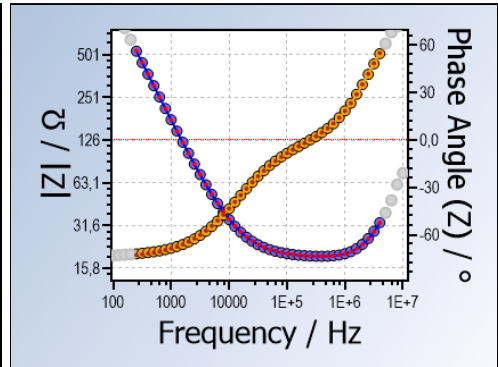

**FIT PARAMETERS:**

| Fix? | Name         | Value     | Error (Relative)        |
|------|--------------|-----------|-------------------------|
|      | Inductance 1 | 1,09E-006 | 2,67E-009 (0,2445345 %) |
|      | Resistance 1 | 18,877392 | 0,0183223 (0,0970594 %) |
|      | CPE Q 1      | 4,22E-006 | 2,07E-008 (0,4915953 %) |
|      | CPE Alpha 1  | 0,8288661 | 0,0005174 (0,0624244 %) |

**RelaxIS 3.0.20.16 - Report**



Datasource: 60C\_3.0\_1

Circuit: I-R-P

| Type             | Value     |
|------------------|-----------|
| Temperature:     | 60,000000 |
| Free variable:   | 0,0       |
| DC Voltage:      | N/A       |
| AC Voltage:      | N/A       |
| Time:            | 46,504812 |
| Harmonic:        | N/A       |
| Free Variable 2: | N/A       |
| Area:            | N/A       |
| Thickness:       | N/A       |

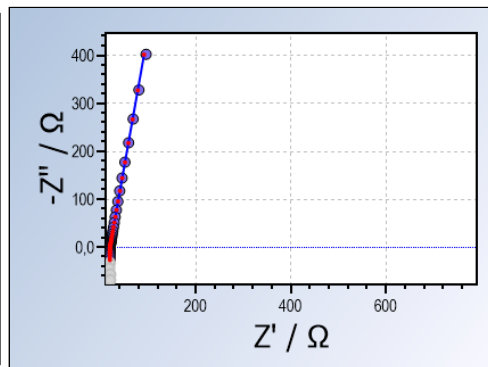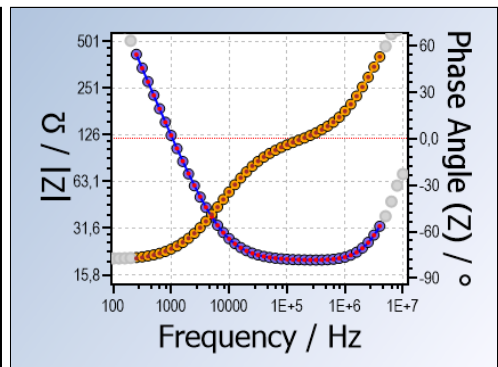

**FIT PARAMETERS:**

| Fix? | Name         | Value     | Error (Relative)        |
|------|--------------|-----------|-------------------------|
|      | Inductance 1 | 1,04E-006 | 1,91E-009 (0,1831540 %) |
|      | Resistance 1 | 19,607559 | 0,0124369 (0,0634293 %) |
|      | CPE Q 1      | 3,55E-006 | 1,35E-008 (0,3812391 %) |
|      | CPE Alpha 1  | 0,8874981 | 0,0004114 (0,0463601 %) |

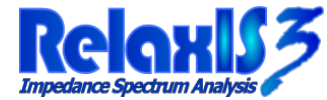

**RelaxIS 3.0.20.16 - Report**

Datasource: 70C\_2.5\_1

Circuit: I-R-P

| Type             | Value     |
|------------------|-----------|
| Temperature:     | 70,000000 |
| Free variable:   | 0,5000000 |
| DC Voltage:      | N/A       |
| AC Voltage:      | N/A       |
| Time:            | 46,375107 |
| Harmonic:        | N/A       |
| Free Variable 2: | N/A       |
| Area:            | N/A       |
| Thickness:       | N/A       |

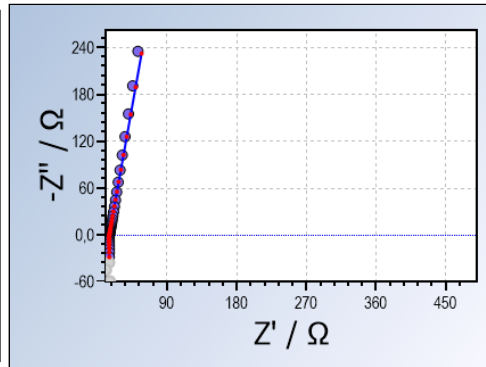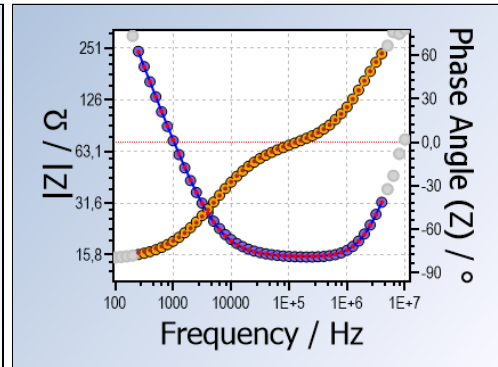

**FIT PARAMETERS:**

| Fix? | Name         | Value     | Error (Relative)        |
|------|--------------|-----------|-------------------------|
|      | Inductance 1 | 1,13E-006 | 5,22E-009 (0,4632273 %) |
|      | Resistance 1 | 15,373573 | 0,0292011 (0,1899436 %) |
|      | CPE Q 1      | 6,17E-006 | 7,55E-008 (1,2234295 %) |
|      | CPE Alpha 1  | 0,8868513 | 0,0013448 (0,1516406 %) |

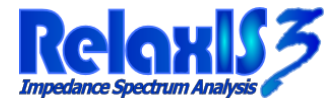

**RelaxIS 3.0.20.16 - Report**

Datasource: 70C\_2.6\_1

Circuit: I-R-P

| Type             | Value     |
|------------------|-----------|
| Temperature:     | 70,000000 |
| Free variable:   | 0,4000000 |
| DC Voltage:      | N/A       |
| AC Voltage:      | N/A       |
| Time:            | 48,077650 |
| Harmonic:        | N/A       |
| Free Variable 2: | N/A       |
| Area:            | N/A       |
| Thickness:       | N/A       |

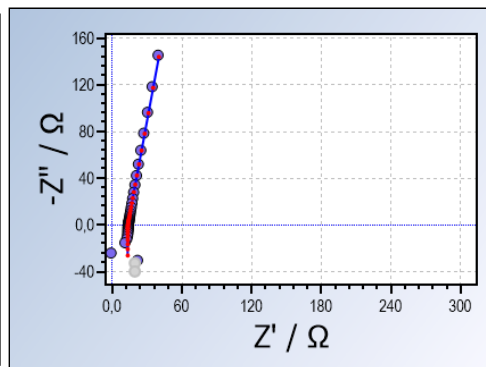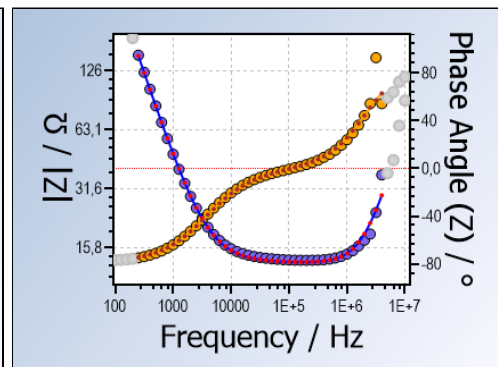

**FIT PARAMETERS:**

| Fix? | Name         | Value     | Error (Relative)        |
|------|--------------|-----------|-------------------------|
|      | Inductance 1 | 1,04E-006 | 4,10E-008 (3,9387795 %) |
|      | Resistance 1 | 13,278711 | 0,2207090 (1,6621269 %) |
|      | CPE Q 1      | 1,02E-005 | 1,20E-006 (11,697361 %) |
|      | CPE Alpha 1  | 0,8828648 | 0,0130877 (1,4824101 %) |

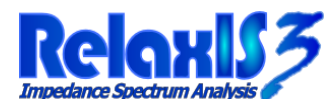

**RelaxIS 3.0.20.16 - Report**

Datasource: 70C\_2.7\_1

Circuit: I-R-P

| Type             | Value     |
|------------------|-----------|
| Temperature:     | 70,000000 |
| Free variable:   | 0,3000000 |
| DC Voltage:      | N/A       |
| AC Voltage:      | N/A       |
| Time:            | 46,124254 |
| Harmonic:        | N/A       |
| Free Variable 2: | N/A       |
| Area:            | N/A       |
| Thickness:       | N/A       |

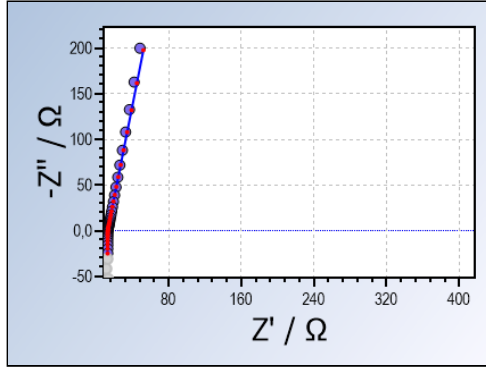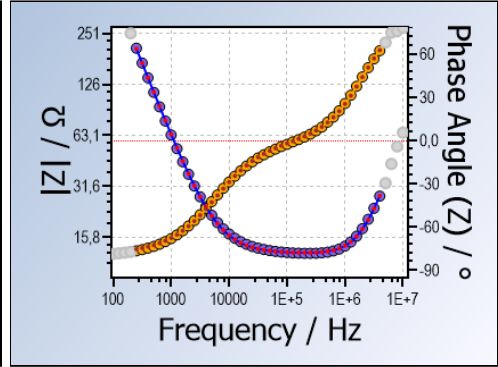

**FIT PARAMETERS:**

| Fix? | Name         | Value     | Error (Relative)        |
|------|--------------|-----------|-------------------------|
|      | Inductance 1 | 9,90E-007 | 4,39E-009 (0,4429653 %) |
|      | Resistance 1 | 12,714339 | 0,0242062 (0,1903854 %) |
|      | CPE Q 1      | 7,89E-006 | 9,41E-008 (1,1934853 %) |
|      | CPE Alpha 1  | 0,8748934 | 0,0013078 (0,1494764 %) |

**RelaxIS 3.0.20.16 - Report**



Datasource: 70C\_2.8\_1

Circuit: I-R-P

| Type             | Value     |
|------------------|-----------|
| Temperature:     | 70,000000 |
| Free variable:   | 0,2000000 |
| DC Voltage:      | N/A       |
| AC Voltage:      | N/A       |
| Time:            | 46,447638 |
| Harmonic:        | N/A       |
| Free Variable 2: | N/A       |
| Area:            | N/A       |
| Thickness:       | N/A       |

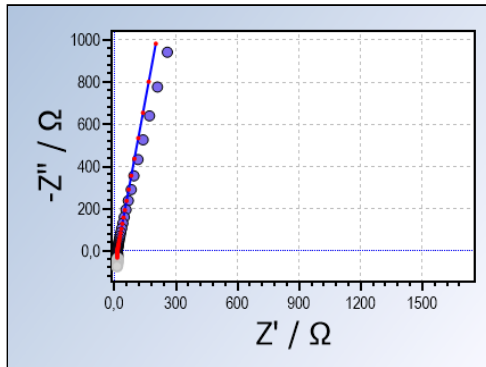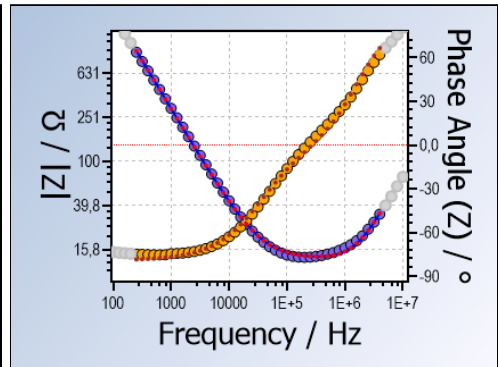

**FIT PARAMETERS:**

| Fix? | Name         | Value     | Error (Relative)        |
|------|--------------|-----------|-------------------------|
|      | Inductance 1 | 1,25E-006 | 2,31E-008 (1,8446422 %) |
|      | Resistance 1 | 13,387204 | 0,1359515 (1,0155328 %) |
|      | CPE Q 1      | 1,53E-006 | 6,08E-008 (3,9588168 %) |
|      | CPE Alpha 1  | 0,8797645 | 0,0039707 (0,4513362 %) |

**RelaxIS 3.0.20.16 - Report**



Datasource: 70C\_2.9\_1

Circuit: I-R-P

| Type           | Value     |
|----------------|-----------|
| Temperature:   | 70,000000 |
| Free variable: | 0,1000000 |
| DC Voltage:    | N/A       |
| AC Voltage:    | N/A       |
| Time:          | 47,902054 |
| Harmonic:      | N/A       |
| Free Variable  | N/A       |

2:  
 Area: N/A  
 Thickness: N/A

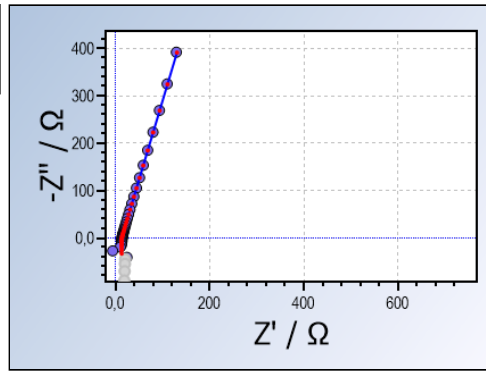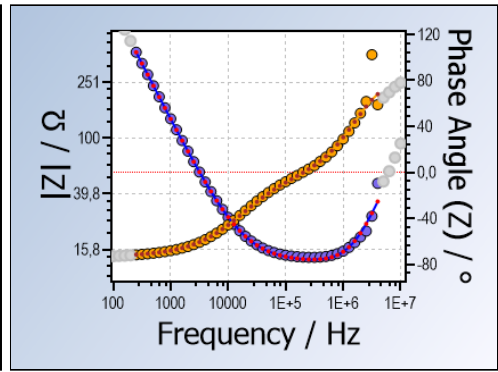

**FIT PARAMETERS:**

| Fix? | Name         | Value     | Error (Relative)        |
|------|--------------|-----------|-------------------------|
|      | Inductance 1 | 1,31E-006 | 5,17E-008 (3,9581274 %) |
|      | Resistance 1 | 13,036310 | 0,2945726 (2,2596315 %) |
|      | CPE Q 1      | 6,08E-006 | 6,19E-007 (10,186474 %) |
|      | CPE Alpha 1  | 0,8143188 | 0,0106446 (1,3071755 %) |

**RelaxIS 3.0.20.16 - Report**

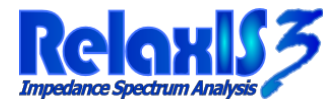

Datasource: 70C\_3.0\_1

Circuit: I-R-P

| Type             | Value     |
|------------------|-----------|
| Temperature:     | 70,000000 |
| Free variable:   | 0,0       |
| DC Voltage:      | N/A       |
| AC Voltage:      | N/A       |
| Time:            | 47,216634 |
| Harmonic:        | N/A       |
| Free Variable 2: | N/A       |
| Area:            | N/A       |
| Thickness:       | N/A       |

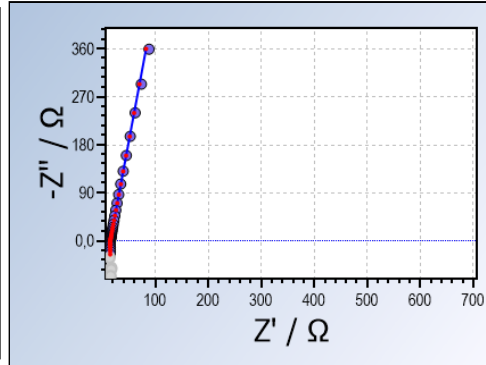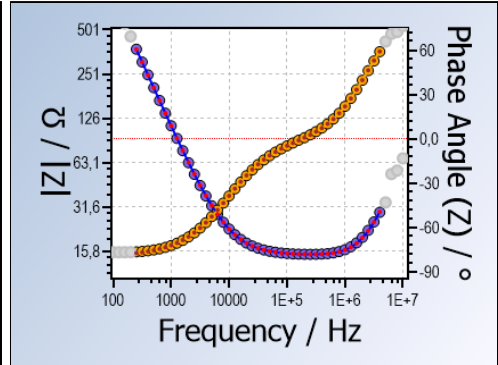

**FIT PARAMETERS:**

| Fix? | Name         | Value     | Error (Relative)        |
|------|--------------|-----------|-------------------------|
|      | Inductance 1 | 1,01E-006 | 2,09E-009 (0,2061825 %) |
|      | Resistance 1 | 14,984800 | 0,0126779 (0,0846051 %) |
|      | CPE Q 1      | 4,13E-006 | 1,96E-008 (0,4740170 %) |
|      | CPE Alpha 1  | 0,8818344 | 0,0005066 (0,0574521 %) |

**RelaxIS 3.0.20.16 - Report**

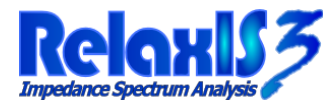

Datasource: 80C\_2.5\_1

Circuit: I-R-P

| Type             | Value     |
|------------------|-----------|
| Temperature:     | 80,000000 |
| Free variable:   | 0,5000000 |
| DC Voltage:      | N/A       |
| AC Voltage:      | N/A       |
| Time:            | 46,101986 |
| Harmonic:        | N/A       |
| Free Variable 2: | N/A       |
| Area:            | N/A       |
| Thickness:       | N/A       |

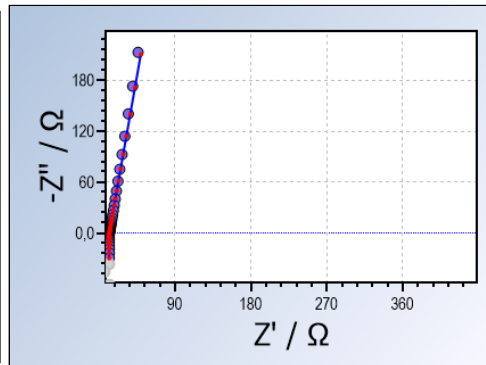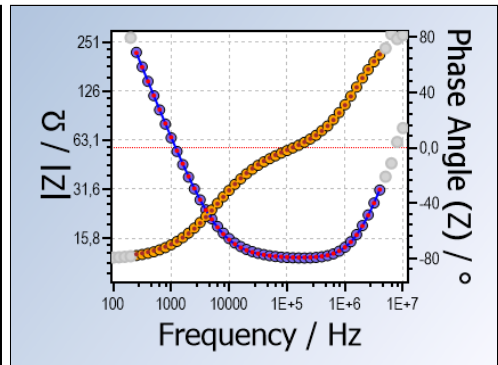



**FIT PARAMETERS:**

| Fix? | Name         | Value     | Error (Relative)        |
|------|--------------|-----------|-------------------------|
|      | Inductance 1 | 1,17E-006 | 4,46E-009 (0,3821629 %) |
|      | Resistance 1 | 11,966199 | 0,0221461 (0,1850722 %) |
|      | CPE Q 1      | 6,76E-006 | 7,54E-008 (1,1152395 %) |
|      | CPE Alpha 1  | 0,8879814 | 0,0012159 (0,1369276 %) |

**RelaxIS 3.0.20.16 - Report**

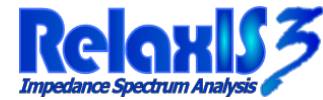

Datasource: 80C\_2.6\_1

Circuit: I-R-P

| Type             | Value     |
|------------------|-----------|
| Temperature:     | 80,000000 |
| Free variable:   | 0,4000000 |
| DC Voltage:      | N/A       |
| AC Voltage:      | N/A       |
| Time:            | 48,139004 |
| Harmonic:        | N/A       |
| Free Variable 2: | N/A       |
| Area:            | N/A       |
| Thickness:       | N/A       |

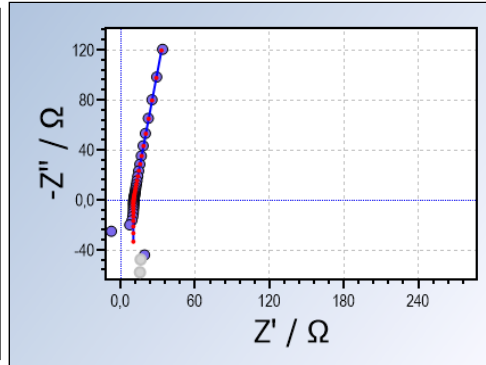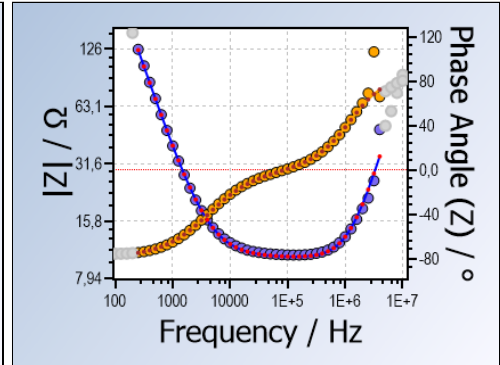

**FIT PARAMETERS:**

| Fix? | Name         | Value     | Error (Relative)        |
|------|--------------|-----------|-------------------------|
|      | Inductance 1 | 1,32E-006 | 4,69E-008 (3,5503349 %) |
|      | Resistance 1 | 10,251250 | 0,1980530 (1,9319884 %) |
|      | CPE Q 1      | 1,25E-005 | 1,59E-006 (12,713985 %) |
|      | CPE Alpha 1  | 0,8809448 | 0,0141673 (1,6081909 %) |

**RelaxIS 3.0.20.16 - Report**

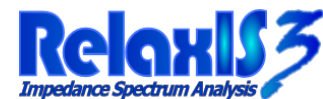

Datasource: 80C\_2.7\_1

Circuit: I-R-P

| Type             | Value     |
|------------------|-----------|
| Temperature:     | 80,000000 |
| Free variable:   | 0,3000000 |
| DC Voltage:      | N/A       |
| AC Voltage:      | N/A       |
| Time:            | 46,144798 |
| Harmonic:        | N/A       |
| Free Variable 2: | N/A       |
| Area:            | N/A       |
| Thickness:       | N/A       |

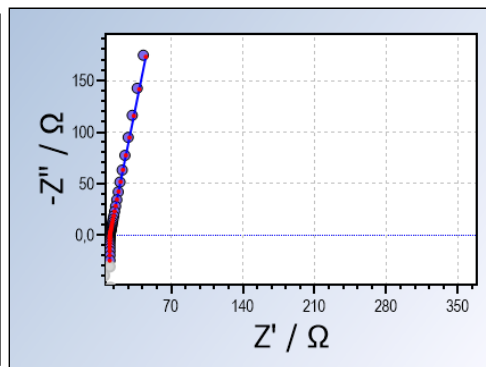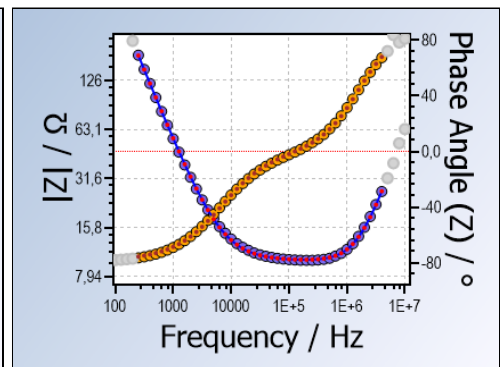

**FIT PARAMETERS:**

| Fix? | Name         | Value     | Error (Relative)        |
|------|--------------|-----------|-------------------------|
|      | Inductance 1 | 9,83E-007 | 3,61E-009 (0,3671863 %) |
|      | Resistance 1 | 9,9551805 | 0,0180174 (0,1809851 %) |
|      | CPE Q 1      | 9,17E-006 | 9,84E-008 (1,0724380 %) |
|      | CPE Alpha 1  | 0,8722600 | 0,0011675 (0,1338463 %) |

**RelaxIS 3.0.20.16 - Report**

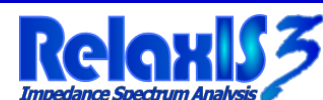

Datasource: 80C\_2.8\_1

Circuit: I-R-P

| Type             | Value     |
|------------------|-----------|
| Temperature:     | 80,000000 |
| Free variable:   | 0,2000000 |
| DC Voltage:      | N/A       |
| AC Voltage:      | N/A       |
| Time:            | 46,015404 |
| Harmonic:        | N/A       |
| Free Variable 2: | N/A       |
| Area:            | N/A       |
| Thickness:       | N/A       |

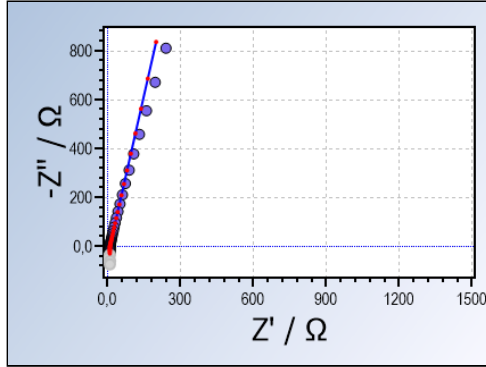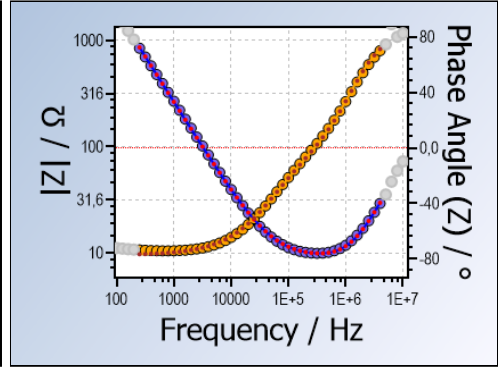

**FIT PARAMETERS:**

| Fix? | Name         | Value     | Error (Relative)        |
|------|--------------|-----------|-------------------------|
|      | Inductance 1 | 1,13E-006 | 7,94E-009 (0,7009272 %) |
|      | Resistance 1 | 9,5033681 | 0,0448834 (0,4722894 %) |
|      | CPE Q 1      | 2,11E-006 | 3,44E-008 (1,6347496 %) |
|      | CPE Alpha 1  | 0,8575699 | 0,0016170 (0,1885511 %) |

**RelaxIS 3.0.20.16 - Report**



Datasource: 80C\_2.9\_1

Circuit: I-R-P

| Type             | Value     |
|------------------|-----------|
| Temperature:     | 80,000000 |
| Free variable:   | 0,1000000 |
| DC Voltage:      | N/A       |
| AC Voltage:      | N/A       |
| Time:            | 47,830360 |
| Harmonic:        | N/A       |
| Free Variable 2: | N/A       |
| Area:            | N/A       |
| Thickness:       | N/A       |

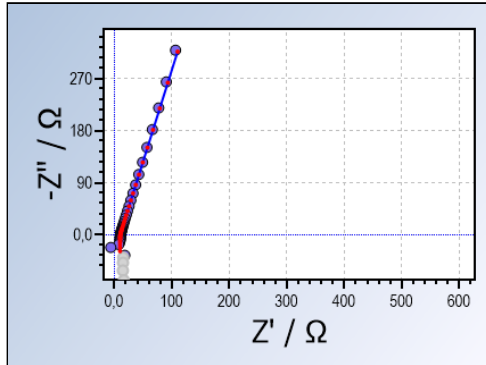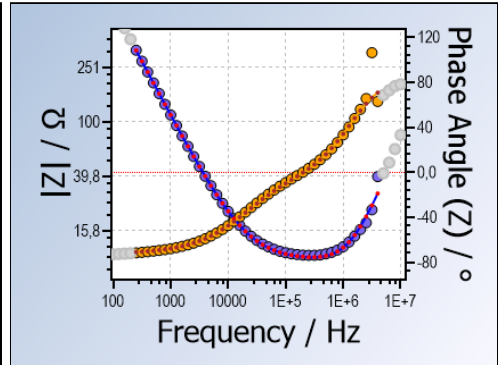

**FIT PARAMETERS:**

| Fix? | Name         | Value     | Error (Relative)        |
|------|--------------|-----------|-------------------------|
|      | Inductance 1 | 1,13E-006 | 4,27E-008 (3,7773694 %) |
|      | Resistance 1 | 9,7763194 | 0,2325174 (2,3783736 %) |
|      | CPE Q 1      | 8,00E-006 | 8,10E-007 (10,120395 %) |
|      | CPE Alpha 1  | 0,8051586 | 0,0105191 (1,3064603 %) |

**RelaxIS 3.0.20.16 - Report**



Datasource: 80C\_3.0\_1

Circuit: I-R-P

| Type           | Value     |
|----------------|-----------|
| Temperature:   | 80,000000 |
| Free variable: | 0,0       |
| DC Voltage:    | N/A       |
| AC Voltage:    | N/A       |
| Time:          | 46,134721 |
| Harmonic:      | N/A       |
| Free Variable  | N/A       |

2:  
 Area: N/A  
 Thickness: N/A

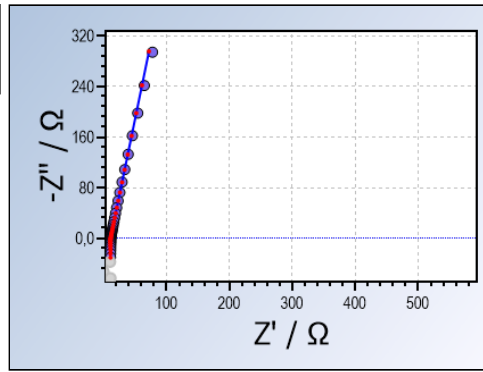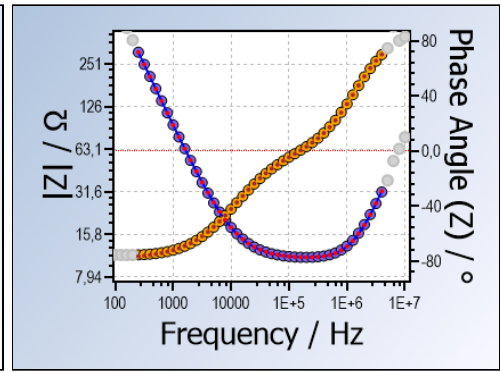

**FIT PARAMETERS:**

| Fix? | Name         | Value     | Error (Relative)        |
|------|--------------|-----------|-------------------------|
|      | Inductance 1 | 1,21E-006 | 2,61E-009 (0,2158660 %) |
|      | Resistance 1 | 10,776954 | 0,0128730 (0,1194493 %) |
|      | CPE Q 1      | 5,45E-006 | 3,31E-008 (0,6062470 %) |
|      | CPE Alpha 1  | 0,8702271 | 0,0006423 (0,0738105 %) |

**RelaxIS 3.0.20.16 - Report**



Datasource: 35C-2.5.txt\_1

Circuit: I-(R)(C)-P

| Type             | Value     |
|------------------|-----------|
| Temperature:     | 35,000000 |
| Free variable:   | 0,5000000 |
| DC Voltage:      | N/A       |
| AC Voltage:      | N/A       |
| Time:            | 46,426855 |
| Harmonic:        | N/A       |
| Free Variable 2: | N/A       |
| Area:            | N/A       |
| Thickness:       | N/A       |

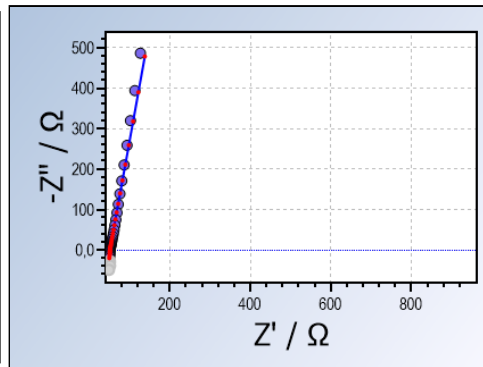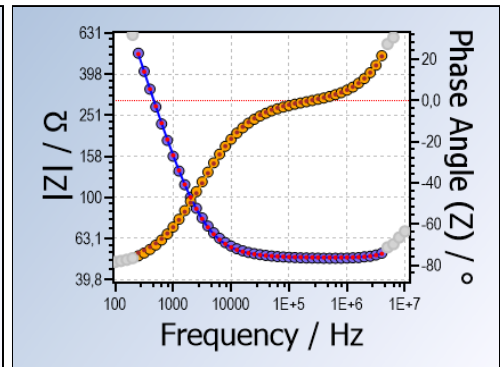

**FIT PARAMETERS:**

| Fix? | Name          | Value     | Error (Relative)        |
|------|---------------|-----------|-------------------------|
|      | Inductance 1  | 1,11E-006 | 4,91E-008 (4,4380929 %) |
|      | Resistance 1  | 50,900516 | 0,0966160 (0,1898133 %) |
|      | Capacitance 1 | 1,30E-010 | 1,92E-011 (14,763270 %) |
|      | CPE Q 1       | 3,02E-006 | 4,20E-008 (1,3926969 %) |
|      | CPE Alpha 1   | 0,8857453 | 0,0015721 (0,1774928 %) |

**RelaxIS 3.0.20.16 - Report**



Datasource: 35C-2.6.txt\_1

Circuit: I-(R)(C)-P

| Type             | Value     |
|------------------|-----------|
| Temperature:     | 35,000000 |
| Free variable:   | 0,4000000 |
| DC Voltage:      | N/A       |
| AC Voltage:      | N/A       |
| Time:            | 46,654734 |
| Harmonic:        | N/A       |
| Free Variable 2: | N/A       |
| Area:            | N/A       |
| Thickness:       | N/A       |

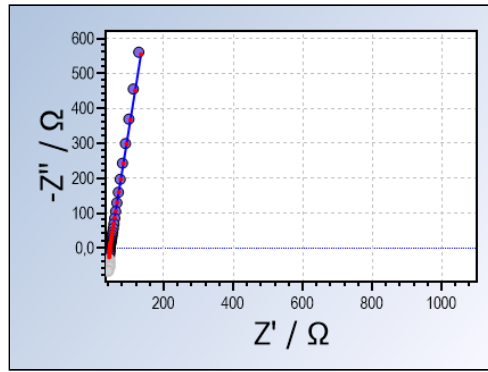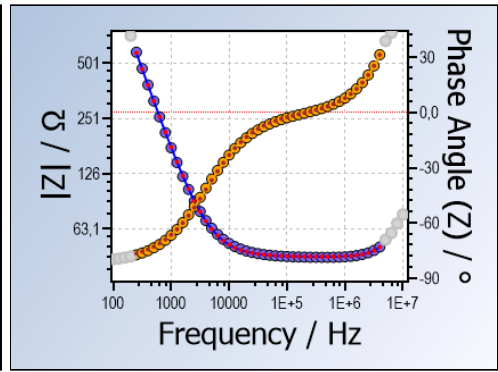

**FIT PARAMETERS:**

| Fix? | Name          | Value     | Error (Relative)        |
|------|---------------|-----------|-------------------------|
|      | Inductance 1  | 1,38E-006 | 3,36E-008 (2,4294139 %) |
|      | Resistance 1  | 44,506398 | 0,0730773 (0,1641951 %) |
|      | Capacitance 1 | 1,73E-010 | 1,72E-011 (9,9681174 %) |
|      | CPE Q 1       | 2,40E-006 | 2,66E-008 (1,1110486 %) |
|      | CPE Alpha 1   | 0,8976343 | 0,0012362 (0,1377128 %) |

**RelaxIS 3.0.20.16 - Report**

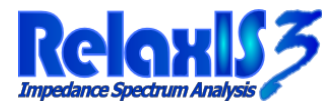

Datasource: 35C-2.7.txt\_1

Circuit: I-(R)(C)-P

| Type             | Value     |
|------------------|-----------|
| Temperature:     | 35,000000 |
| Free variable:   | 0,3000000 |
| DC Voltage:      | N/A       |
| AC Voltage:      | N/A       |
| Time:            | 46,744449 |
| Harmonic:        | N/A       |
| Free Variable 2: | N/A       |
| Area:            | N/A       |
| Thickness:       | N/A       |

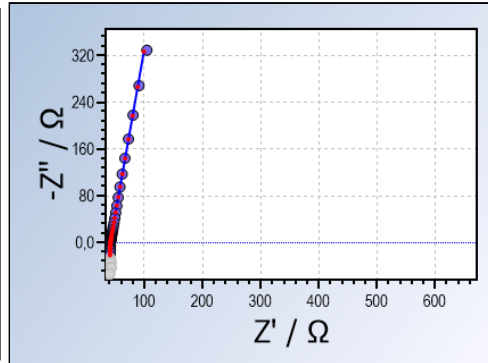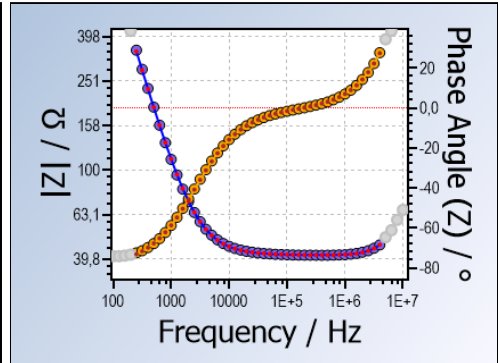

**FIT PARAMETERS:**

| Fix? | Name          | Value     | Error (Relative)        |
|------|---------------|-----------|-------------------------|
|      | Inductance 1  | 1,04E-006 | 2,31E-008 (2,2301713 %) |
|      | Resistance 1  | 41,420811 | 0,0290327 (0,0700921 %) |
|      | Capacitance 1 | 1,07E-010 | 1,35E-011 (12,693360 %) |
|      | CPE Q 1       | 4,33E-006 | 2,37E-008 (0,5473253 %) |
|      | CPE Alpha 1   | 0,8887754 | 0,0006232 (0,0701190 %) |

**RelaxIS 3.0.20.16 - Report**

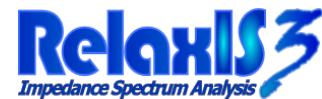

Datasource: 35C-2.9.txt\_1

Circuit: I-(R)(C)-P

| Type             | Value     |
|------------------|-----------|
| Temperature:     | 35,000000 |
| Free variable:   | 0,1000000 |
| DC Voltage:      | N/A       |
| AC Voltage:      | N/A       |
| Time:            | 46,569143 |
| Harmonic:        | N/A       |
| Free Variable 2: | N/A       |
| Area:            | N/A       |

Thickness: N/A

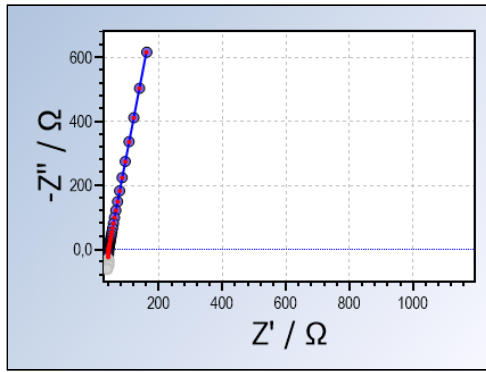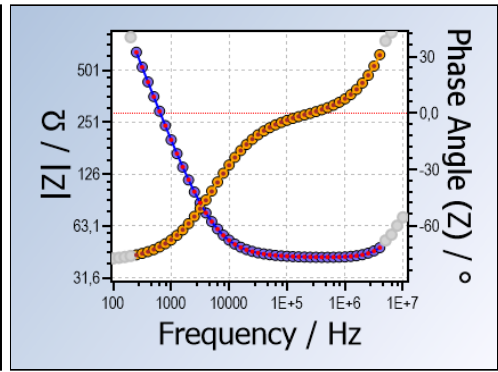

**FIT PARAMETERS:**

| Fix? | Name          | Value     | Error (Relative)        |
|------|---------------|-----------|-------------------------|
|      | Inductance 1  | 1,23E-006 | 1,22E-008 (0,9904096 %) |
|      | Resistance 1  | 41,535215 | 0,0224969 (0,0541634 %) |
|      | Capacitance 1 | 1,52E-010 | 7,16E-012 (4,7216485 %) |
|      | CPE Q 1       | 2,46E-006 | 8,35E-009 (0,3389644 %) |
|      | CPE Alpha 1   | 0,8786473 | 0,0003725 (0,0423911 %) |

**RelaxIS 3.0.20.16 - Report**

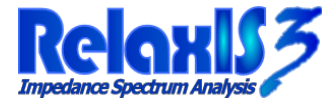

Datasource: 50C-2.5.txt\_1

Circuit: I-(R)(C)-P

| Type             | Value     |
|------------------|-----------|
| Temperature:     | 50,000000 |
| Free variable:   | 0,5000000 |
| DC Voltage:      | N/A       |
| AC Voltage:      | N/A       |
| Time:            | 46,555848 |
| Harmonic:        | N/A       |
| Free Variable 2: | N/A       |
| Area:            | N/A       |
| Thickness:       | N/A       |

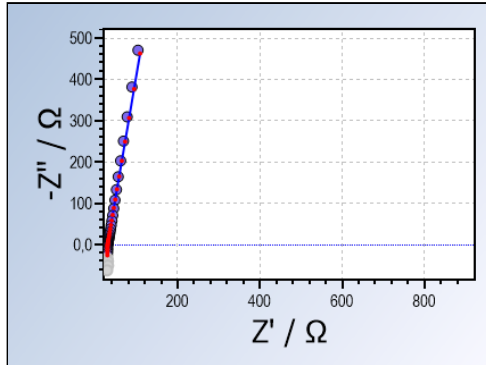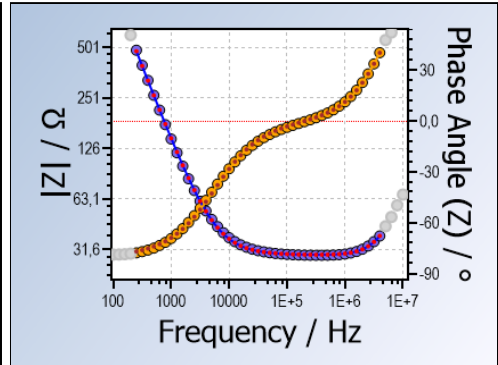

**FIT PARAMETERS:**

| Fix? | Name          | Value     | Error (Relative)        |
|------|---------------|-----------|-------------------------|
|      | Inductance 1  | 1,11E-006 | 5,47E-008 (4,9455645 %) |
|      | Resistance 1  | 29,312834 | 0,0585825 (0,1998527 %) |
|      | Capacitance 1 | 1,37E-010 | 6,40E-011 (46,772049 %) |
|      | CPE Q 1       | 2,99E-006 | 3,71E-008 (1,2433083 %) |
|      | CPE Alpha 1   | 0,8920742 | 0,0013642 (0,1529285 %) |

**RelaxIS 3.0.20.16 - Report**

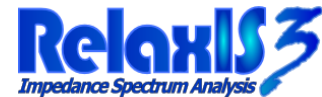

Datasource: 50C-2.6.txt\_1

Circuit: I-(R)(C)-P

| Type             | Value     |
|------------------|-----------|
| Temperature:     | 50,000000 |
| Free variable:   | 0,4000000 |
| DC Voltage:      | N/A       |
| AC Voltage:      | N/A       |
| Time:            | 46,448463 |
| Harmonic:        | N/A       |
| Free Variable 2: | N/A       |
| Area:            | N/A       |

Thickness: N/A

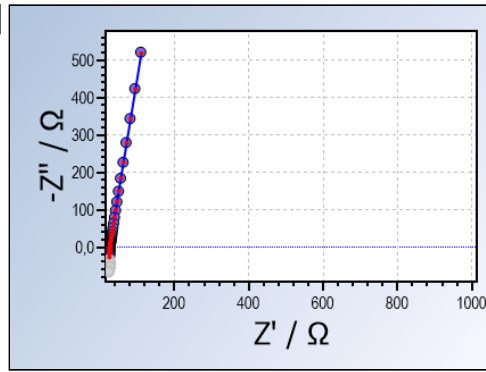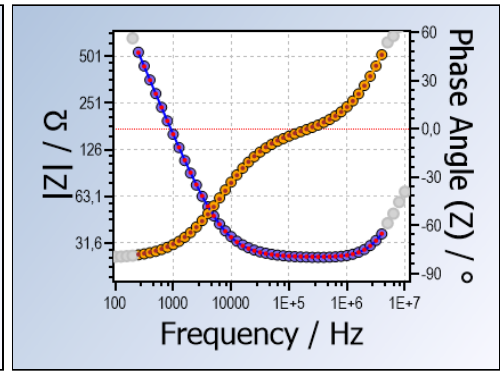

**FIT PARAMETERS:**

| Fix? | Name          | Value     | Error (Relative)        |
|------|---------------|-----------|-------------------------|
|      | Inductance 1  | 1,20E-006 | 2,64E-008 (2,2075399 %) |
|      | Resistance 1  | 25,674864 | 0,0375345 (0,1461917 %) |
|      | Capacitance 1 | 2,18E-010 | 4,04E-011 (18,505613 %) |
|      | CPE Q 1       | 2,58E-006 | 2,18E-008 (0,8439895 %) |
|      | CPE Alpha 1   | 0,8963801 | 0,0009138 (0,1019385 %) |

**RelaxIS 3.0.20.16 - Report**

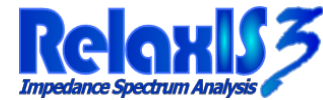

Datasource: 50C-2.7.txt\_1

Circuit: I-(R)(C)-P

| Type             | Value     |
|------------------|-----------|
| Temperature:     | 50,000000 |
| Free variable:   | 0,3000000 |
| DC Voltage:      | N/A       |
| AC Voltage:      | N/A       |
| Time:            | 46,363335 |
| Harmonic:        | N/A       |
| Free Variable 2: | N/A       |
| Area:            | N/A       |
| Thickness:       | N/A       |

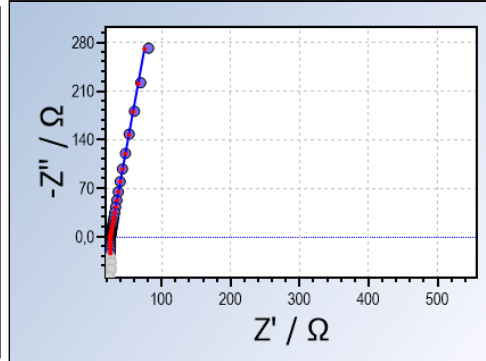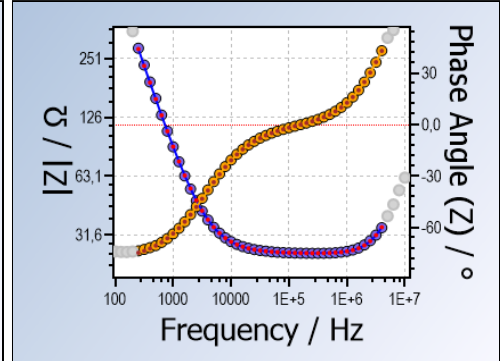

**FIT PARAMETERS:**

| Fix? | Name          | Value     | Error (Relative)        |
|------|---------------|-----------|-------------------------|
|      | Inductance 1  | 1,01E-006 | 3,74E-008 (3,6979405 %) |
|      | Resistance 1  | 25,444099 | 0,0235919 (0,0927207 %) |
|      | Capacitance 1 | 9,78E-011 | 5,78E-011 (59,156822 %) |
|      | CPE Q 1       | 5,36E-006 | 3,47E-008 (0,6479978 %) |
|      | CPE Alpha 1   | 0,8850393 | 0,0007254 (0,0819622 %) |

**RelaxIS 3.0.20.16 - Report**

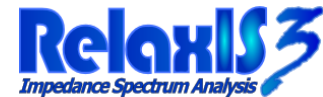

Datasource: 50C-2.9.txt\_1

Circuit: I-(R)(C)-P

| Type             | Value     |
|------------------|-----------|
| Temperature:     | 50,000000 |
| Free variable:   | 0,1000000 |
| DC Voltage:      | N/A       |
| AC Voltage:      | N/A       |
| Time:            | 46,959170 |
| Harmonic:        | N/A       |
| Free Variable 2: | N/A       |
| Area:            | N/A       |

Thickness: N/A

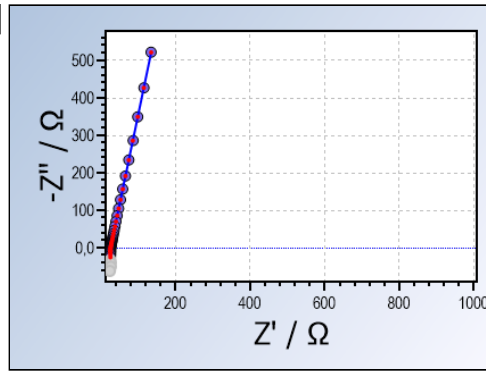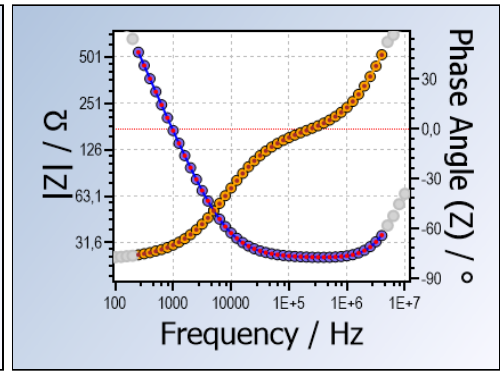

**FIT PARAMETERS:**

| Fix? | Name          | Value     | Error (Relative)        |
|------|---------------|-----------|-------------------------|
|      | Inductance 1  | 1,06E-006 | 1,61E-008 (1,5098371 %) |
|      | Resistance 1  | 25,220597 | 0,0111304 (0,0441320 %) |
|      | Capacitance 1 | 1,03E-010 | 2,53E-011 (24,462230 %) |
|      | CPE Q 1       | 3,13E-006 | 7,63E-009 (0,2438954 %) |
|      | CPE Alpha 1   | 0,8686692 | 0,0002627 (0,0302397 %) |

**RelaxIS 3.0.20.16 - Report**



Datasource: 65C-2.5.txt\_1

Circuit: I-(R)(C)-P

| Type             | Value     |
|------------------|-----------|
| Temperature:     | 65,000000 |
| Free variable:   | 0,5000000 |
| DC Voltage:      | N/A       |
| AC Voltage:      | N/A       |
| Time:            | 46,834743 |
| Harmonic:        | N/A       |
| Free Variable 2: | N/A       |
| Area:            | N/A       |
| Thickness:       | N/A       |

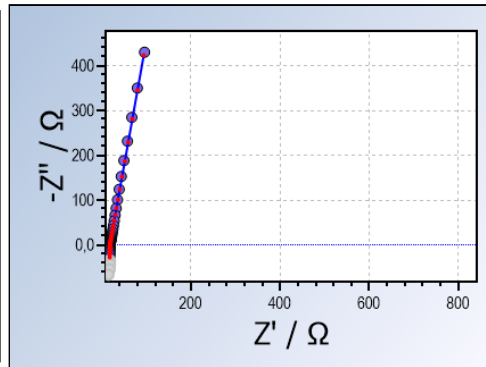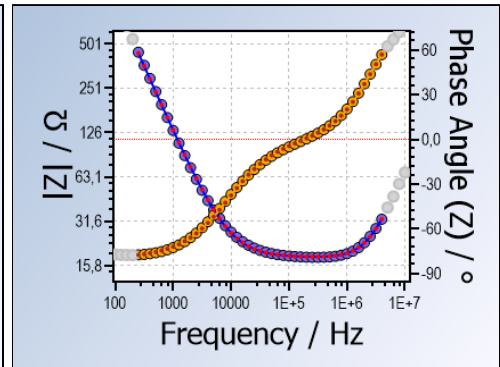

**FIT PARAMETERS:**

| Fix? | Name          | Value     | Error (Relative)        |
|------|---------------|-----------|-------------------------|
|      | Inductance 1  | 1,18E-006 | 4,07E-008 (3,4498690 %) |
|      | Resistance 1  | 18,022201 | 0,0388497 (0,2155656 %) |
|      | Capacitance 1 | 2,44E-010 | 1,26E-010 (51,673279 %) |
|      | CPE Q 1       | 3,39E-006 | 3,94E-008 (1,1638223 %) |
|      | CPE Alpha 1   | 0,8869013 | 0,0012475 (0,1406561 %) |

**RelaxIS 3.0.20.16 - Report**



Datasource: 65C-2.6.txt\_1

Circuit: I-(R)(C)-P

| Type             | Value     |
|------------------|-----------|
| Temperature:     | 65,000000 |
| Free variable:   | 0,4000000 |
| DC Voltage:      | N/A       |
| AC Voltage:      | N/A       |
| Time:            | 46,850815 |
| Harmonic:        | N/A       |
| Free Variable 2: | N/A       |
| Area:            | N/A       |

Thickness: N/A

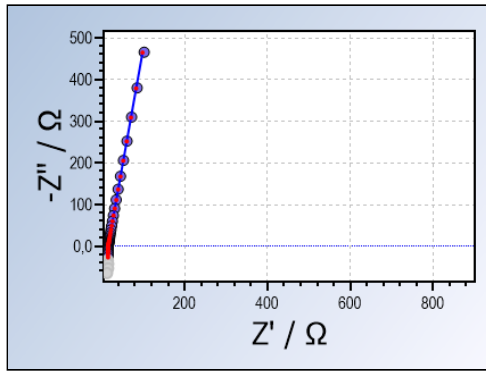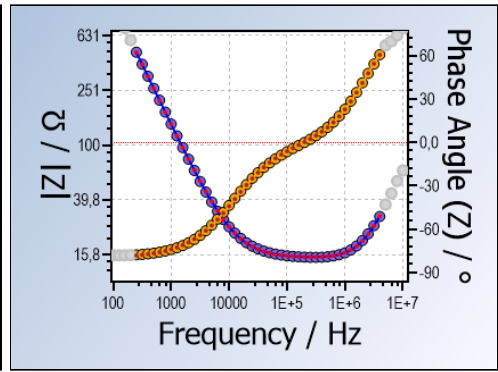

**FIT PARAMETERS:**

| Fix? | Name          | Value     | Error (Relative)        |
|------|---------------|-----------|-------------------------|
|      | Inductance 1  | 1,12E-006 | 2,19E-008 (1,9500771 %) |
|      | Resistance 1  | 15,083111 | 0,0184834 (0,1225436 %) |
|      | Capacitance 1 | 2,70E-010 | 9,68E-011 (35,922029 %) |
|      | CPE Q 1       | 3,07E-006 | 1,86E-008 (0,6045673 %) |
|      | CPE Alpha 1   | 0,8873002 | 0,0006382 (0,0719292 %) |

**RelaxIS 3.0.20.16 - Report**

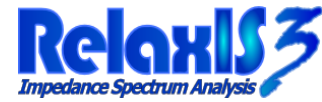

Datasource: 65C-2.7.txt\_1

Circuit: I-(R)(C)-P

| Type             | Value     |
|------------------|-----------|
| Temperature:     | 65,000000 |
| Free variable:   | 0,3000000 |
| DC Voltage:      | N/A       |
| AC Voltage:      | N/A       |
| Time:            | 46,345473 |
| Harmonic:        | N/A       |
| Free Variable 2: | N/A       |
| Area:            | N/A       |
| Thickness:       | N/A       |

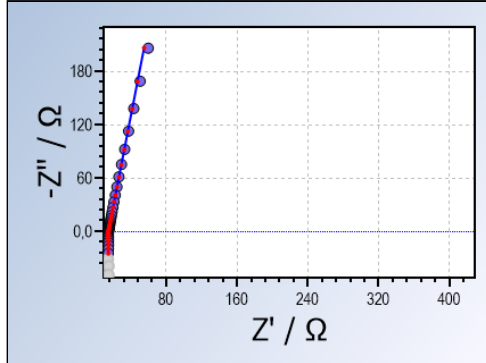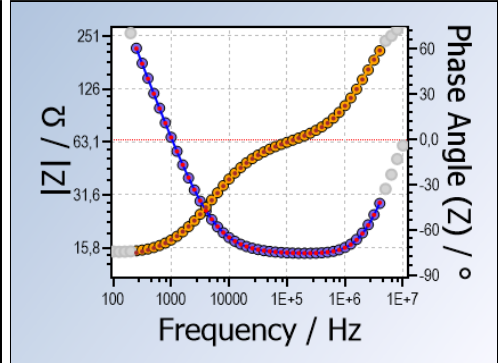

**FIT PARAMETERS:**

| Fix? | Name          | Value     | Error (Relative)        |
|------|---------------|-----------|-------------------------|
|      | Inductance 1  | 9,82E-007 | 1,30E-007 (13,199880 %) |
|      | Resistance 1  | 14,677919 | 0,0152765 (0,1040784 %) |
|      | Capacitance 1 | 1,11E-015 | 6,00E-010 (5,41E+007 %) |
|      | CPE Q 1       | 7,45E-006 | 5,09E-008 (0,6838111 %) |
|      | CPE Alpha 1   | 0,8770801 | 0,0007536 (0,0859179 %) |

**RelaxIS 3.0.20.16 - Report**

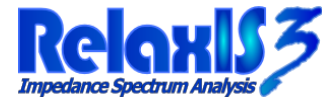

Datasource: 65C-2.9.txt\_1

Circuit: I-(R)(C)-P

| Type             | Value     |
|------------------|-----------|
| Temperature:     | 65,000000 |
| Free variable:   | 0,1000000 |
| DC Voltage:      | N/A       |
| AC Voltage:      | N/A       |
| Time:            | 47,007935 |
| Harmonic:        | N/A       |
| Free Variable 2: | N/A       |
| Area:            | N/A       |



Thickness: N/A

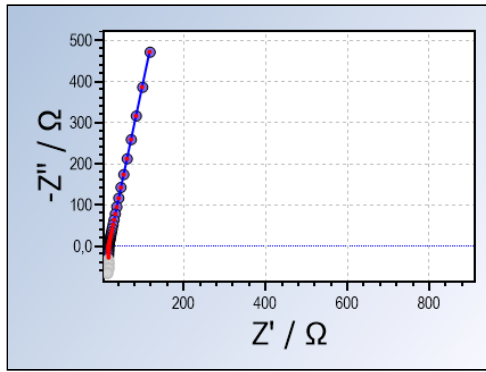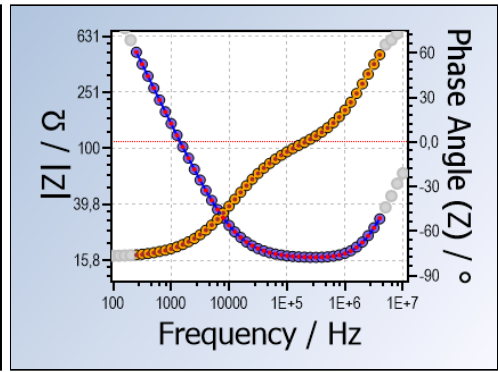

**FIT PARAMETERS:**

| Fix? | Name          | Value     | Error (Relative)        |
|------|---------------|-----------|-------------------------|
|      | Inductance 1  | 1,09E-006 | 9,54E-008 (8,7773680 %) |
|      | Resistance 1  | 16,410146 | 0,0096309 (0,0586889 %) |
|      | Capacitance 1 | 1,06E-015 | 3,55E-010 (3,35E+007 %) |
|      | CPE Q 1       | 3,49E-006 | 1,07E-008 (0,3067717 %) |
|      | CPE Alpha 1   | 0,8670409 | 0,0003247 (0,0374546 %) |

**RelaxIS 3.0.20.16 - Report**



Datasource: 65C-3.0.txt\_1

Circuit: I-(R)(C)-P

| Type             | Value     |
|------------------|-----------|
| Temperature:     | 65,000000 |
| Free variable:   | 0,0       |
| DC Voltage:      | N/A       |
| AC Voltage:      | N/A       |
| Time:            | 46,867587 |
| Harmonic:        | N/A       |
| Free Variable 2: | N/A       |
| Area:            | N/A       |
| Thickness:       | N/A       |

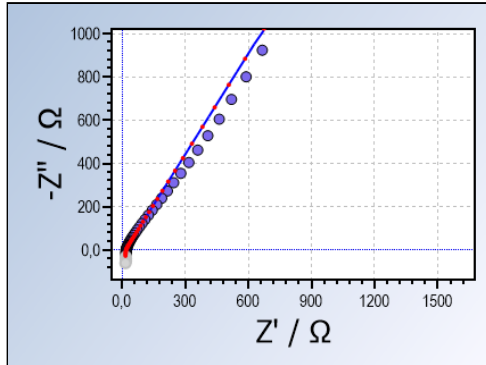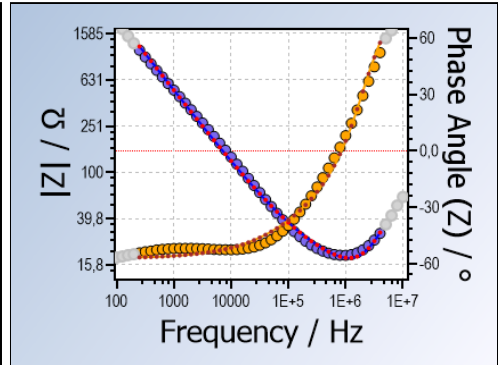

**FIT PARAMETERS:**

| Fix? | Name          | Value     | Error (Relative)        |
|------|---------------|-----------|-------------------------|
|      | Inductance 1  | 1,11E-006 | 1,41E-006 (127,80851 %) |
|      | Resistance 1  | 14,813050 | 0,3757537 (2,5366395 %) |
|      | Capacitance 1 | 1,00E-015 | 6,39E-009 (6,39E+008 %) |
|      | CPE Q 1       | 7,60E-006 | 3,91E-007 (5,1543454 %) |
|      | CPE Alpha 1   | 0,6358814 | 0,0049669 (0,7810972 %) |

**RelaxIS 3.0.20.16 - Report**



Datasource: 30C\_2.5\_1

Circuit: I-(R)(C)-P

| Type             | Value     |
|------------------|-----------|
| Temperature:     | 30,000000 |
| Free variable:   | 0,500000  |
| DC Voltage:      | N/A       |
| AC Voltage:      | N/A       |
| Time:            | 46,475525 |
| Harmonic:        | N/A       |
| Free Variable 2: | N/A       |
| Area:            | N/A       |

Thickness: N/A

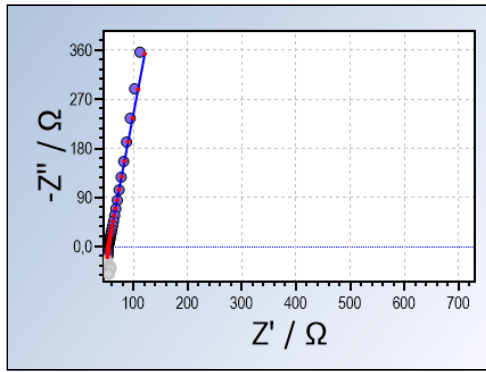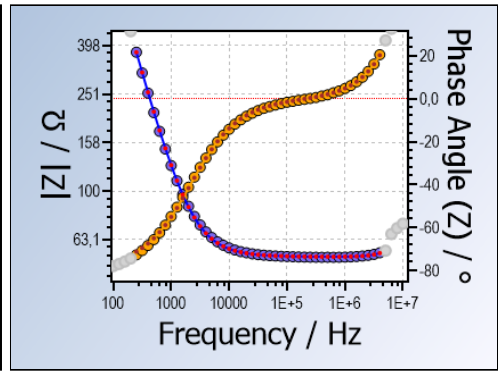

**FIT PARAMETERS:**

| Fix? | Name          | Value     | Error (Relative)        |
|------|---------------|-----------|-------------------------|
|      | Inductance 1  | 1,12E-006 | 3,94E-008 (3,5095418 %) |
|      | Resistance 1  | 53,562010 | 0,0773724 (0,1444539 %) |
|      | Capacitance 1 | 1,25E-010 | 1,39E-011 (11,136964 %) |
|      | CPE Q 1       | 4,26E-006 | 5,06E-008 (1,1880637 %) |
|      | CPE Alpha 1   | 0,8800706 | 0,0013668 (0,1553110 %) |

**RelaxIS 3.0.20.16 - Report**

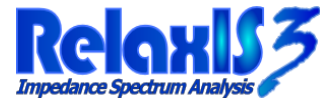

Datasource: 30C\_2.6\_1

Circuit: I-(R)(C)-P

| Type             | Value     |
|------------------|-----------|
| Temperature:     | 30,000000 |
| Free variable:   | 0,4000000 |
| DC Voltage:      | N/A       |
| AC Voltage:      | N/A       |
| Time:            | 45,954356 |
| Harmonic:        | N/A       |
| Free Variable 2: | N/A       |
| Area:            | N/A       |
| Thickness:       | N/A       |

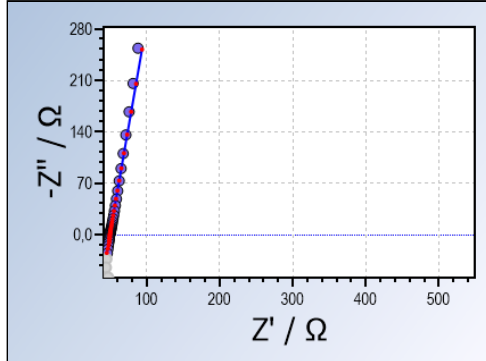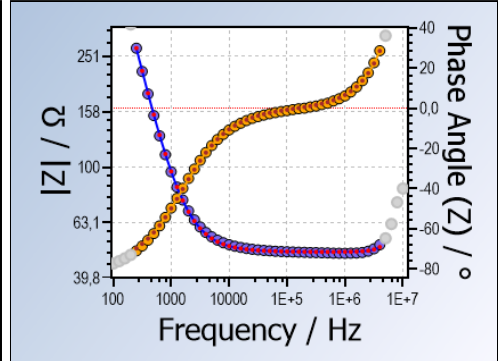

**FIT PARAMETERS:**

| Fix? | Name          | Value     | Error (Relative)        |
|------|---------------|-----------|-------------------------|
|      | Inductance 1  | 1,54E-006 | 2,53E-008 (1,6447429 %) |
|      | Resistance 1  | 49,459236 | 0,0837050 (0,1692404 %) |
|      | Capacitance 1 | 2,45E-010 | 1,07E-011 (4,3790093 %) |
|      | CPE Q 1       | 5,57E-006 | 8,59E-008 (1,5410958 %) |
|      | CPE Alpha 1   | 0,8897323 | 0,0017987 (0,2021575 %) |

**RelaxIS 3.0.20.16 - Report**

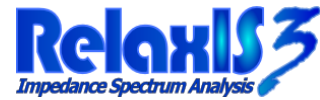

Datasource: 30C\_2.7\_1

Circuit: I-(R)(C)-P

| Type             | Value     |
|------------------|-----------|
| Temperature:     | 30,000000 |
| Free variable:   | 0,3000000 |
| DC Voltage:      | N/A       |
| AC Voltage:      | N/A       |
| Time:            | 45,913954 |
| Harmonic:        | N/A       |
| Free Variable 2: | N/A       |
| Area:            | N/A       |

Thickness: N/A

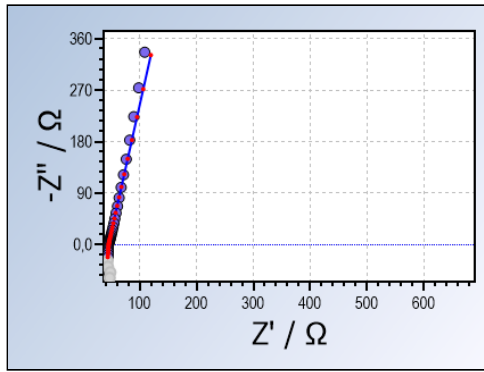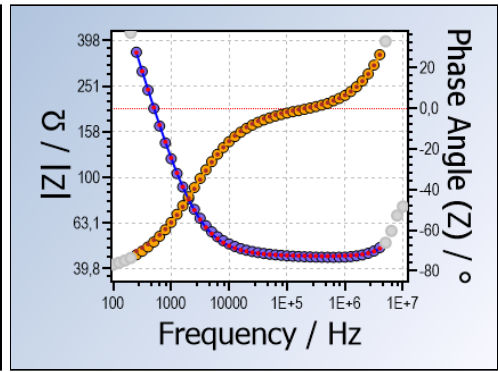

**FIT PARAMETERS:**

| Fix? | Name          | Value     | Error (Relative)        |
|------|---------------|-----------|-------------------------|
|      | Inductance 1  | 1,18E-006 | 5,19E-008 (4,4082517 %) |
|      | Resistance 1  | 45,080765 | 0,1049622 (0,2328315 %) |
|      | Capacitance 1 | 1,55E-010 | 2,59E-011 (16,663034 %) |
|      | CPE Q 1       | 5,25E-006 | 9,47E-008 (1,8045934 %) |
|      | CPE Alpha 1   | 0,8593816 | 0,0020598 (0,2396835 %) |

**RelaxIS 3.0.20.16 - Report**



Datasource: 30C\_2.8\_1

Circuit: I-(R)(C)-P

| Type             | Value     |
|------------------|-----------|
| Temperature:     | 30,000000 |
| Free variable:   | 0,2000000 |
| DC Voltage:      | N/A       |
| AC Voltage:      | N/A       |
| Time:            | 46,170036 |
| Harmonic:        | N/A       |
| Free Variable 2: | N/A       |
| Area:            | N/A       |
| Thickness:       | N/A       |

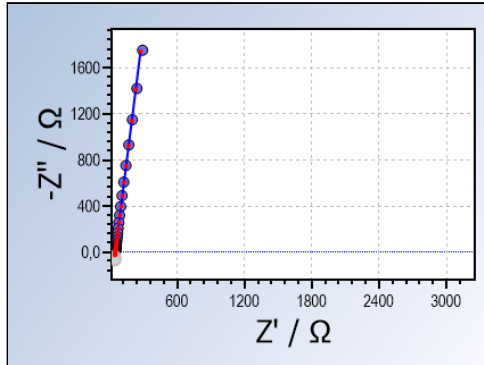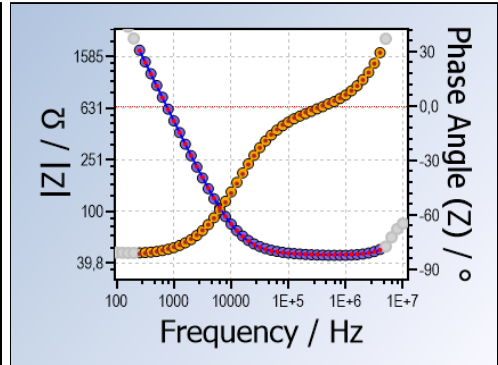

**FIT PARAMETERS:**

| Fix? | Name          | Value     | Error (Relative)        |
|------|---------------|-----------|-------------------------|
|      | Inductance 1  | 1,42E-006 | 2,97E-008 (2,0984660 %) |
|      | Resistance 1  | 46,121203 | 0,0853852 (0,1851322 %) |
|      | Capacitance 1 | 2,02E-010 | 1,43E-011 (7,0774835 %) |
|      | CPE Q 1       | 6,58E-007 | 6,08E-009 (0,9246321 %) |
|      | CPE Alpha 1   | 0,9182072 | 0,0009692 (0,1055490 %) |

**RelaxIS 3.0.20.16 - Report**



Datasource: 30C\_2.9\_1

Circuit: I-(R)(C)-P

| Type             | Value     |
|------------------|-----------|
| Temperature:     | 30,000000 |
| Free variable:   | 0,1000000 |
| DC Voltage:      | N/A       |
| AC Voltage:      | N/A       |
| Time:            | 46,276883 |
| Harmonic:        | N/A       |
| Free Variable 2: | N/A       |
| Area:            | N/A       |

Thickness: N/A

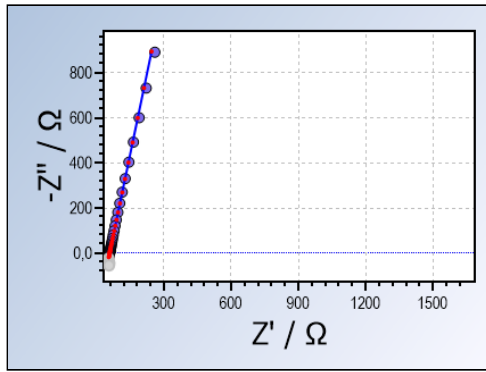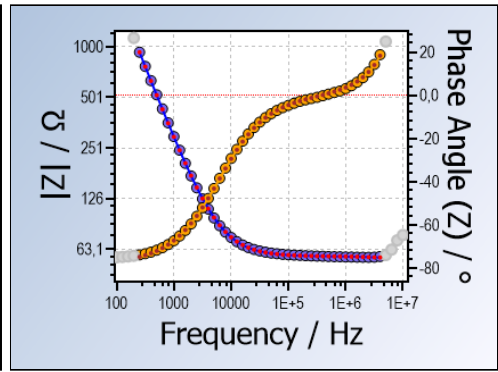

**FIT PARAMETERS:**

| Fix? | Name          | Value     | Error (Relative)        |
|------|---------------|-----------|-------------------------|
|      | Inductance 1  | 1,27E-006 | 2,00E-008 (1,5709481 %) |
|      | Resistance 1  | 57,102532 | 0,0660076 (0,1155949 %) |
|      | Capacitance 1 | 1,82E-010 | 6,32E-012 (3,4654594 %) |
|      | CPE Q 1       | 1,82E-006 | 1,29E-008 (0,7050253 %) |
|      | CPE Alpha 1   | 0,8685528 | 0,0007710 (0,0887663 %) |

**RelaxIS 3.0.20.16 - Report**



Datasource: 30C\_3.0\_1

Circuit: I-(R)(C)-P

| Type             | Value     |
|------------------|-----------|
| Temperature:     | 30,000000 |
| Free variable:   | 0,0       |
| DC Voltage:      | N/A       |
| AC Voltage:      | N/A       |
| Time:            | 46,085674 |
| Harmonic:        | N/A       |
| Free Variable 2: | N/A       |
| Area:            | N/A       |
| Thickness:       | N/A       |

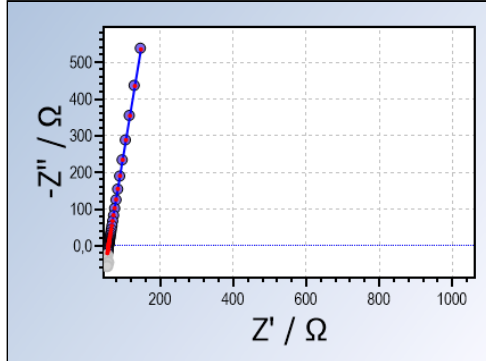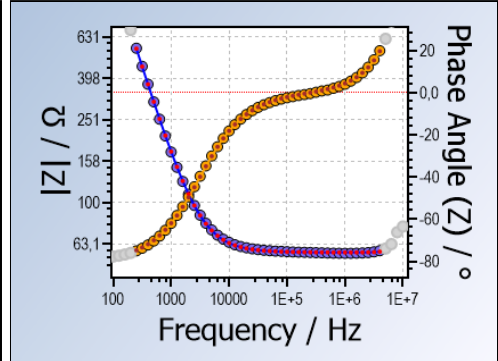

**FIT PARAMETERS:**

| Fix? | Name          | Value     | Error (Relative)        |
|------|---------------|-----------|-------------------------|
|      | Inductance 1  | 1,29E-006 | 2,27E-008 (1,7671797 %) |
|      | Resistance 1  | 57,365955 | 0,0619682 (0,1080226 %) |
|      | Capacitance 1 | 1,60E-010 | 7,07E-012 (4,4239271 %) |
|      | CPE Q 1       | 2,53E-006 | 2,03E-008 (0,8009807 %) |
|      | CPE Alpha 1   | 0,8949093 | 0,0009050 (0,1011292 %) |

**RelaxIS 3.0.20.16 - Report**



Datasource: 40C\_2.5\_1

Circuit: I-(R)(C)-P

| Type             | Value     |
|------------------|-----------|
| Temperature:     | 40,000000 |
| Free variable:   | 0,5000000 |
| DC Voltage:      | N/A       |
| AC Voltage:      | N/A       |
| Time:            | 46,347910 |
| Harmonic:        | N/A       |
| Free Variable 2: | N/A       |
| Area:            | N/A       |

Thickness: N/A

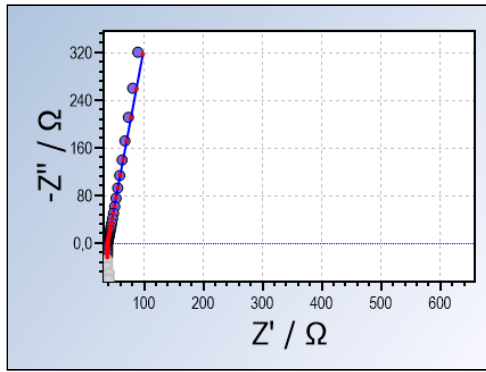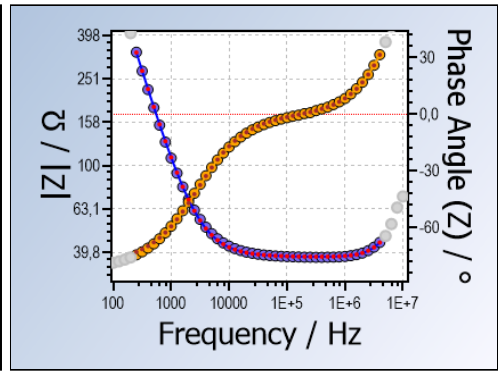

**FIT PARAMETERS:**

| Fix? | Name          | Value     | Error (Relative)        |
|------|---------------|-----------|-------------------------|
|      | Inductance 1  | 1,03E-006 | 7,93E-008 (7,6691190 %) |
|      | Resistance 1  | 37,899483 | 0,0638533 (0,1684805 %) |
|      | Capacitance 1 | 7,63E-011 | 5,53E-011 (72,486119 %) |
|      | CPE Q 1       | 4,68E-006 | 5,96E-008 (1,2731047 %) |
|      | CPE Alpha 1   | 0,8816664 | 0,0014461 (0,1640236 %) |

**RelaxIS 3.0.20.16 - Report**



Datasource: 40C\_2.6\_1

Circuit: I-(R)(C)-P

| Type             | Value     |
|------------------|-----------|
| Temperature:     | 40,000000 |
| Free variable:   | 0,4000000 |
| DC Voltage:      | N/A       |
| AC Voltage:      | N/A       |
| Time:            | 45,967963 |
| Harmonic:        | N/A       |
| Free Variable 2: | N/A       |
| Area:            | N/A       |
| Thickness:       | N/A       |

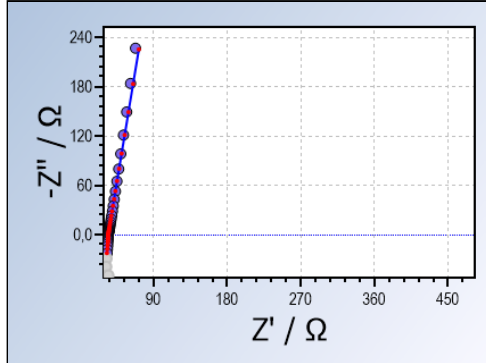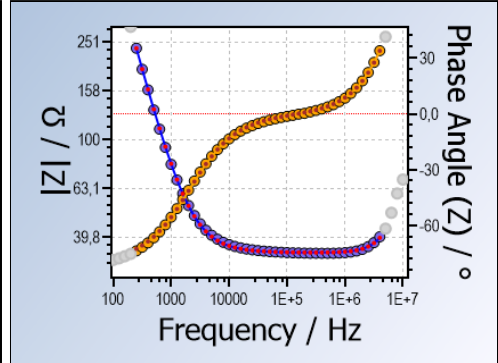

**FIT PARAMETERS:**

| Fix? | Name          | Value     | Error (Relative)        |
|------|---------------|-----------|-------------------------|
|      | Inductance 1  | 1,17E-006 | 2,17E-008 (1,8522538 %) |
|      | Resistance 1  | 34,420283 | 0,0501915 (0,1458196 %) |
|      | Capacitance 1 | 2,52E-010 | 1,87E-011 (7,4144160 %) |
|      | CPE Q 1       | 6,01E-006 | 7,29E-008 (1,2146268 %) |
|      | CPE Alpha 1   | 0,8950259 | 0,0013998 (0,1563955 %) |

**RelaxIS 3.0.20.16 - Report**



Datasource: 40C\_2.7\_1

Circuit: I-(R)(C)-P

| Type             | Value     |
|------------------|-----------|
| Temperature:     | 40,000000 |
| Free variable:   | 0,3000000 |
| DC Voltage:      | N/A       |
| AC Voltage:      | N/A       |
| Time:            | 46,168176 |
| Harmonic:        | N/A       |
| Free Variable 2: | N/A       |
| Area:            | N/A       |

Thickness: N/A

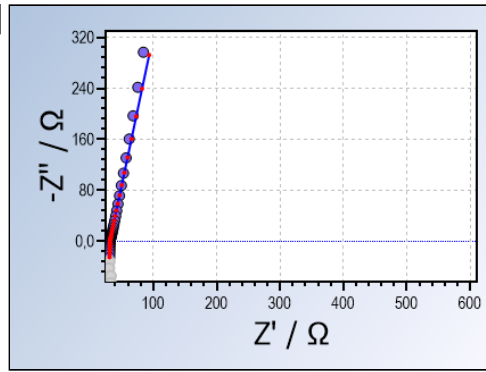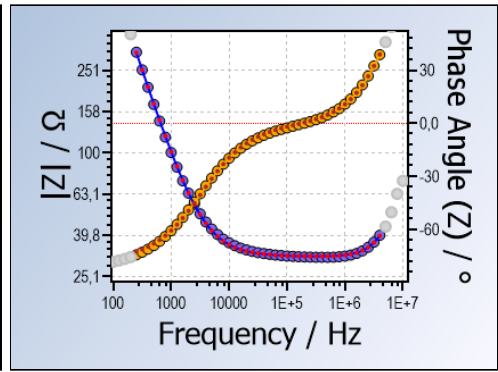

**FIT PARAMETERS:**

| Fix? | Name          | Value     | Error (Relative)        |
|------|---------------|-----------|-------------------------|
|      | Inductance 1  | 1,17E-006 | 5,08E-008 (4,3343092 %) |
|      | Resistance 1  | 31,380855 | 0,0749389 (0,2388044 %) |
|      | Capacitance 1 | 1,78E-010 | 5,20E-011 (29,257801 %) |
|      | CPE Q 1       | 5,64E-006 | 9,65E-008 (1,7103917 %) |
|      | CPE Alpha 1   | 0,8670406 | 0,0019287 (0,2224435 %) |

**RelaxIS 3.0.20.16 - Report**



Datasource: 40C\_2.8\_1

Circuit: I-(R)(C)-P

| Type             | Value     |
|------------------|-----------|
| Temperature:     | 40,000000 |
| Free variable:   | 0,2000000 |
| DC Voltage:      | N/A       |
| AC Voltage:      | N/A       |
| Time:            | 46,458004 |
| Harmonic:        | N/A       |
| Free Variable 2: | N/A       |
| Area:            | N/A       |
| Thickness:       | N/A       |

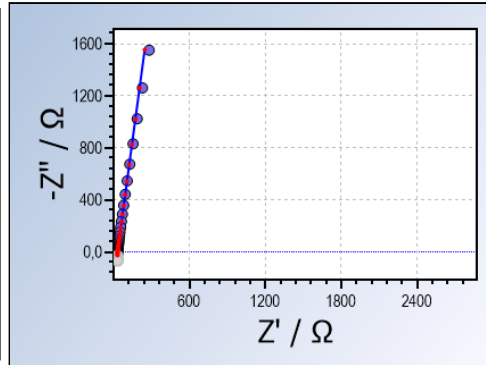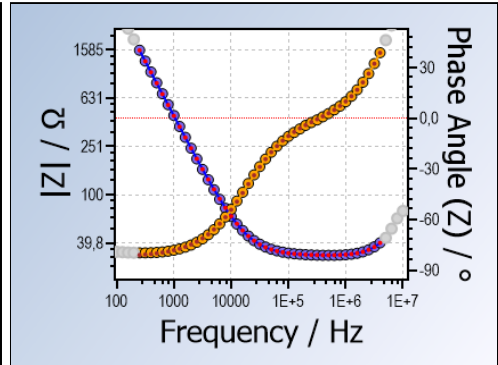

**FIT PARAMETERS:**

| Fix? | Name          | Value     | Error (Relative)        |
|------|---------------|-----------|-------------------------|
|      | Inductance 1  | 1,12E-006 | 3,96E-008 (3,5204950 %) |
|      | Resistance 1  | 31,334641 | 0,0436912 (0,1394341 %) |
|      | Capacitance 1 | 1,19E-010 | 4,05E-011 (34,012102 %) |
|      | CPE Q 1       | 7,69E-007 | 4,89E-009 (0,6351030 %) |
|      | CPE Alpha 1   | 0,9124039 | 0,0006550 (0,0717918 %) |

**RelaxIS 3.0.20.16 - Report**



Datasource: 40C\_2.9\_1

Circuit: I-(R)(C)-P

| Type             | Value     |
|------------------|-----------|
| Temperature:     | 40,000000 |
| Free variable:   | 0,1000000 |
| DC Voltage:      | N/A       |
| AC Voltage:      | N/A       |
| Time:            | 46,611480 |
| Harmonic:        | N/A       |
| Free Variable 2: | N/A       |
| Area:            | N/A       |

Thickness: N/A

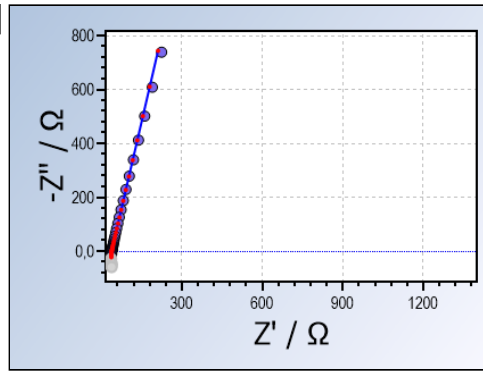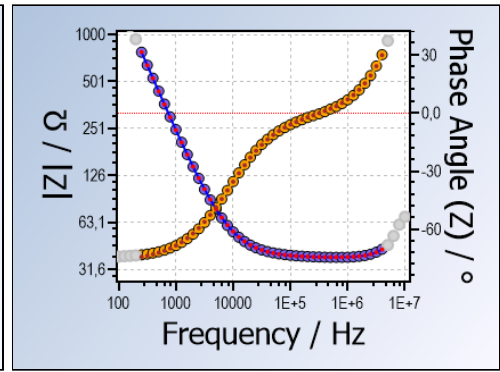

**FIT PARAMETERS:**

| Fix? | Name          | Value     | Error (Relative)        |
|------|---------------|-----------|-------------------------|
|      | Inductance 1  | 1,08E-006 | 2,21E-008 (2,0397528 %) |
|      | Resistance 1  | 37,543047 | 0,0418399 (0,1114450 %) |
|      | Capacitance 1 | 1,64E-010 | 1,58E-011 (9,6283275 %) |
|      | CPE Q 1       | 2,43E-006 | 1,50E-008 (0,6164824 %) |
|      | CPE Alpha 1   | 0,8542492 | 0,0006638 (0,0777092 %) |

**RelaxIS 3.0.20.16 - Report**



Datasource: 40C\_3.0\_1

Circuit: I-(R)(C)-P

| Type             | Value     |
|------------------|-----------|
| Temperature:     | 40,000000 |
| Free variable:   | 0,0       |
| DC Voltage:      | N/A       |
| AC Voltage:      | N/A       |
| Time:            | 46,417170 |
| Harmonic:        | N/A       |
| Free Variable 2: | N/A       |
| Area:            | N/A       |
| Thickness:       | N/A       |

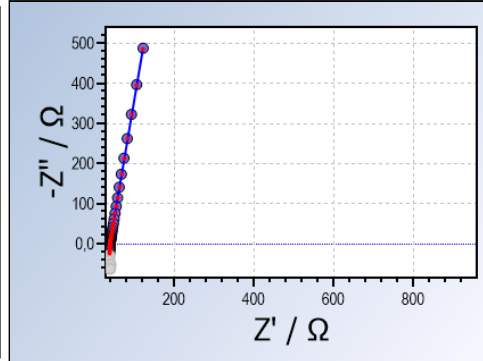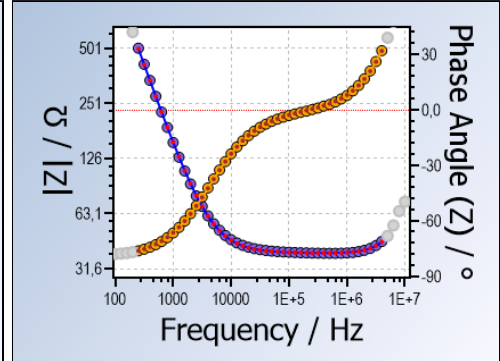

**FIT PARAMETERS:**

| Fix? | Name          | Value     | Error (Relative)        |
|------|---------------|-----------|-------------------------|
|      | Inductance 1  | 1,18E-006 | 1,88E-008 (1,5957212 %) |
|      | Resistance 1  | 38,410978 | 0,0333380 (0,0867929 %) |
|      | Capacitance 1 | 1,63E-010 | 1,29E-011 (7,9018954 %) |
|      | CPE Q 1       | 2,84E-006 | 1,65E-008 (0,5802658 %) |
|      | CPE Alpha 1   | 0,8925741 | 0,0006446 (0,0722125 %) |

**RelaxIS 3.0.20.16 - Report**



Datasource: 5.5C-2.5.txt\_1

Circuit: I-(R)(P)-P

| Type             | Value     |
|------------------|-----------|
| Temperature:     | 5,5000000 |
| Free variable:   | 0,5000000 |
| DC Voltage:      | N/A       |
| AC Voltage:      | N/A       |
| Time:            | 46,997648 |
| Harmonic:        | N/A       |
| Free Variable 2: | N/A       |
| Area:            | N/A       |

Thickness: N/A

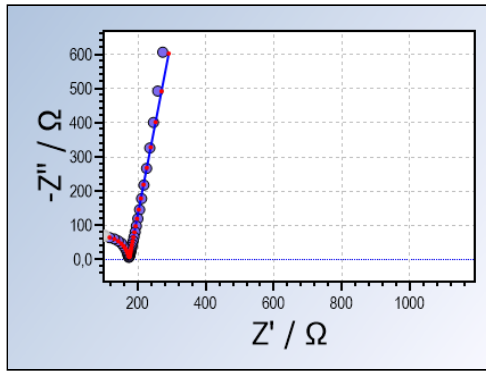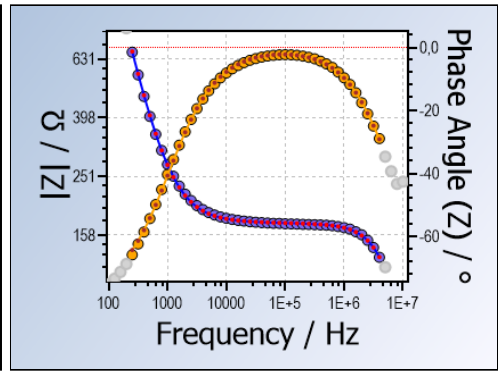

**FIT PARAMETERS:**

| Fix? | Name         | Value     | Error (Relative)        |
|------|--------------|-----------|-------------------------|
|      | Inductance 1 | 3,65E-007 | 4,98E-008 (13,643980 %) |
|      | Resistance 1 | 174,13832 | 0,2489680 (0,1429714 %) |
|      | CPE Q 1      | 4,39E-010 | 5,46E-011 (12,454811 %) |
|      | CPE Alpha 1  | 0,9391211 | 0,0078746 (0,8385071 %) |
|      | CPE Q 2      | 2,53E-006 | 3,45E-008 (1,3635809 %) |
|      | CPE Alpha 2  | 0,8782744 | 0,0016269 (0,1852399 %) |

**RelaxIS 3.0.20.16 - Report**

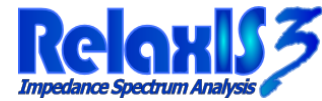

Datasource: 5.5C-2.6.txt\_1

Circuit: I-(R)(P)-P

| Type             | Value     |
|------------------|-----------|
| Temperature:     | 5,5000000 |
| Free variable:   | 0,4000000 |
| DC Voltage:      | N/A       |
| AC Voltage:      | N/A       |
| Time:            | 46,566658 |
| Harmonic:        | N/A       |
| Free Variable 2: | N/A       |
| Area:            | N/A       |
| Thickness:       | N/A       |

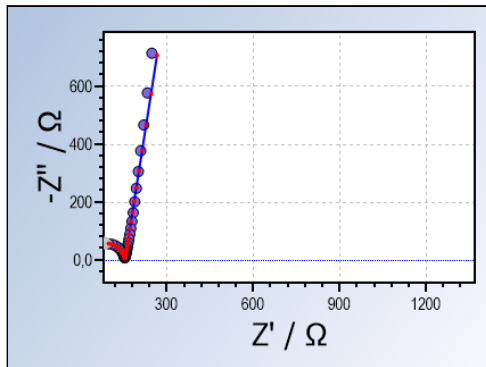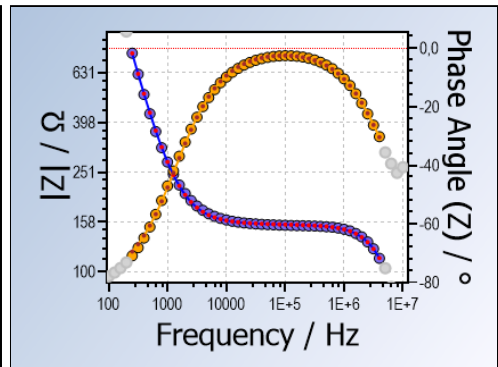

**FIT PARAMETERS:**

| Fix? | Name         | Value     | Error (Relative)        |
|------|--------------|-----------|-------------------------|
|      | Inductance 1 | 3,67E-007 | 4,69E-008 (12,785243 %) |
|      | Resistance 1 | 154,78611 | 0,2612942 (0,1688099 %) |
|      | CPE Q 1      | 6,33E-010 | 8,48E-011 (13,391077 %) |
|      | CPE Alpha 1  | 0,9294711 | 0,0084050 (0,9042812 %) |
|      | CPE Q 2      | 1,84E-006 | 2,67E-008 (1,4500303 %) |
|      | CPE Alpha 2  | 0,9006717 | 0,0017092 (0,1897695 %) |

**RelaxIS 3.0.20.16 - Report**

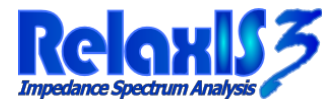

Datasource: 5.5C-2.7.txt\_1

Circuit: I-(R)(P)-P

| Type           | Value     |
|----------------|-----------|
| Temperature:   | 5,5000000 |
| Free variable: | 0,3000000 |
| DC Voltage:    | N/A       |
| AC Voltage:    | N/A       |
| Time:          | 48,079039 |
| Harmonic:      | N/A       |
| Free Variable  | N/A       |



2:  
 Area: N/A  
 Thickness: N/A

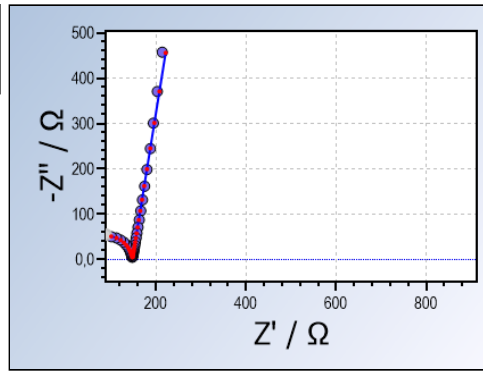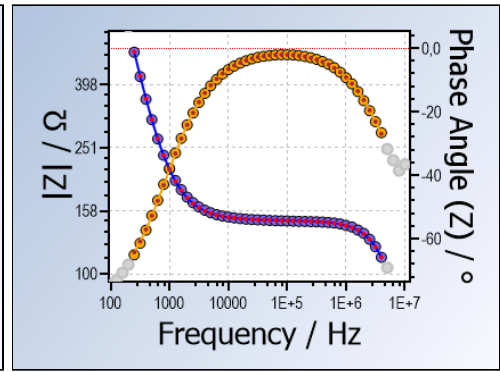

**FIT PARAMETERS:**

| Fix? | Name         | Value     | Error (Relative)        |
|------|--------------|-----------|-------------------------|
|      | Inductance 1 | 4,21E-007 | 2,38E-008 (5,6510426 %) |
|      | Resistance 1 | 147,80115 | 0,1138522 (0,0770306 %) |
|      | CPE Q 1      | 5,51E-010 | 3,89E-011 (7,0639802 %) |
|      | CPE Alpha 1  | 0,9333977 | 0,0044767 (0,4796159 %) |
|      | CPE Q 2      | 2,91E-006 | 2,28E-008 (0,7851064 %) |
|      | CPE Alpha 2  | 0,8979384 | 0,0009423 (0,1049413 %) |

**RelaxIS 3.0.20.16 - Report**

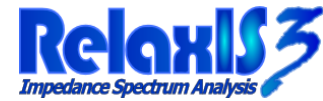

Datasource: 5.5C-2.8.txt\_1

Circuit: I-(R)(P)-P

| Type             | Value     |
|------------------|-----------|
| Temperature:     | 5,5000000 |
| Free variable:   | 0,2000000 |
| DC Voltage:      | N/A       |
| AC Voltage:      | N/A       |
| Time:            | 48,793091 |
| Harmonic:        | N/A       |
| Free Variable 2: | N/A       |
| Area:            | N/A       |
| Thickness:       | N/A       |

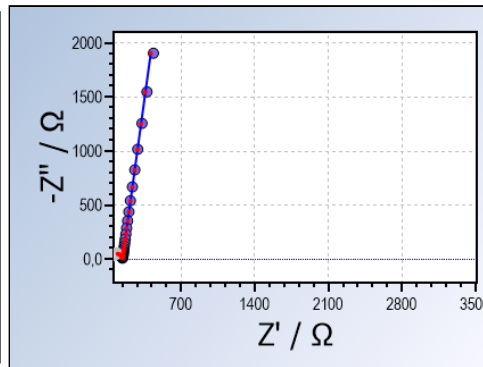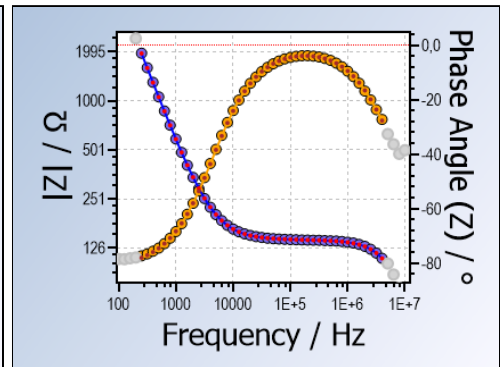

**FIT PARAMETERS:**

| Fix? | Name         | Value     | Error (Relative)        |
|------|--------------|-----------|-------------------------|
|      | Inductance 1 | 3,75E-007 | 1,89E-008 (5,0315300 %) |
|      | Resistance 1 | 140,75398 | 0,0994573 (0,0706604 %) |
|      | CPE Q 1      | 4,92E-010 | 2,92E-011 (5,9217571 %) |
|      | CPE Alpha 1  | 0,9428162 | 0,0037500 (0,3977467 %) |
|      | CPE Q 2      | 6,36E-007 | 2,65E-009 (0,4175967 %) |
|      | CPE Alpha 2  | 0,9105914 | 0,0004647 (0,0510370 %) |

**RelaxIS 3.0.20.16 - Report**

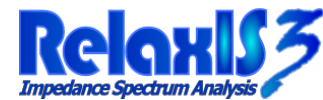

Datasource: 5.5C-2.9.txt\_1

Circuit: I-(R)(P)-P

| Type           | Value     |
|----------------|-----------|
| Temperature:   | 5,5000000 |
| Free variable: | 0,1000000 |
| DC Voltage:    | N/A       |
| AC Voltage:    | N/A       |
| Time:          | 46,359560 |
| Harmonic:      | N/A       |
| Free Variable  | N/A       |

2:  
 Area: N/A  
 Thickness: N/A

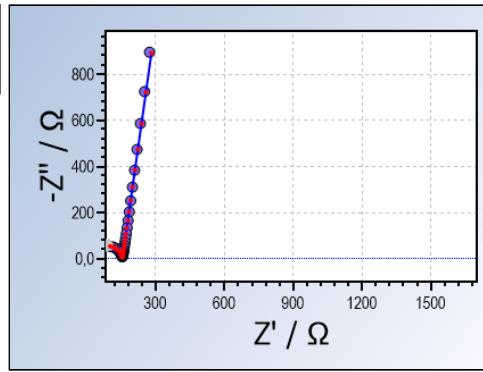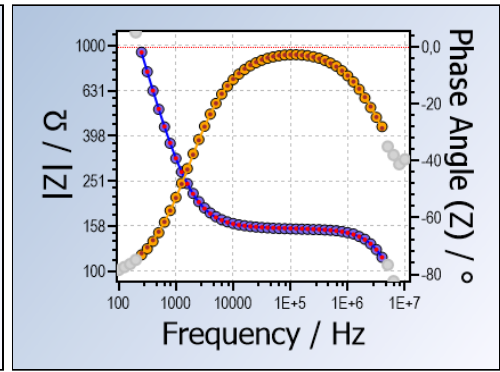

**FIT PARAMETERS:**

| Fix? | Name         | Value     | Error (Relative)        |
|------|--------------|-----------|-------------------------|
|      | Inductance 1 | 3,69E-007 | 2,79E-008 (7,5582102 %) |
|      | Resistance 1 | 154,91822 | 0,1507429 (0,0973048 %) |
|      | CPE Q 1      | 7,40E-010 | 6,01E-011 (8,1182381 %) |
|      | CPE Alpha 1  | 0,9169615 | 0,0051127 (0,5575710 %) |
|      | CPE Q 2      | 1,36E-006 | 1,04E-008 (0,7649625 %) |
|      | CPE Alpha 2  | 0,9102857 | 0,0008916 (0,0979428 %) |

**RelaxIS 3.0.20.16 - Report**

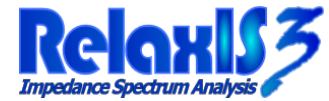

Datasource: 5.5C-3.0.txt\_1

Circuit: I-(R)(P)-P

| Type             | Value     |
|------------------|-----------|
| Temperature:     | 5,5000000 |
| Free variable:   | 0,0       |
| DC Voltage:      | N/A       |
| AC Voltage:      | N/A       |
| Time:            | 49,782693 |
| Harmonic:        | N/A       |
| Free Variable 2: | N/A       |
| Area:            | N/A       |
| Thickness:       | N/A       |

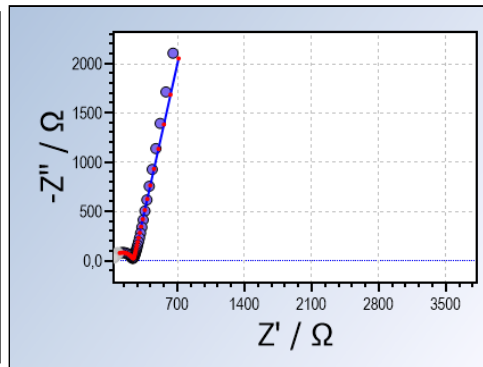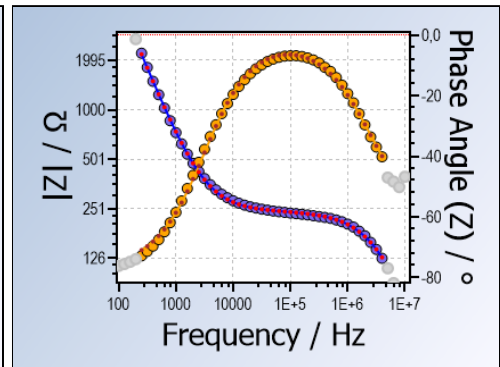

**FIT PARAMETERS:**

| Fix? | Name         | Value     | Error (Relative)        |
|------|--------------|-----------|-------------------------|
|      | Inductance 1 | 1,98E-007 | 7,14E-008 (36,079494 %) |
|      | Resistance 1 | 240,89473 | 0,9517032 (0,3950702 %) |
|      | CPE Q 1      | 5,97E-009 | 9,00E-010 (15,067652 %) |
|      | CPE Alpha 1  | 0,8043790 | 0,0091631 (1,1391506 %) |
|      | CPE Q 2      | 8,63E-007 | 1,96E-008 (2,2646418 %) |
|      | CPE Alpha 2  | 0,8566549 | 0,0025900 (0,3023430 %) |

**RelaxIS 3.0.20.16 - Report**

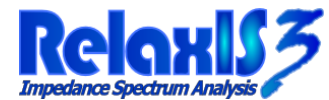

Datasource: 24.1C-2.5.txt\_1

Circuit: I-(R)(P)-P

| Type           | Value     |
|----------------|-----------|
| Temperature:   | 24,400000 |
| Free variable: | 0,5000000 |
| DC Voltage:    | N/A       |
| AC Voltage:    | N/A       |
| Time:          | 46,225245 |
| Harmonic:      | N/A       |
| Free Variable  | N/A       |

2:  
 Area: N/A  
 Thickness: N/A

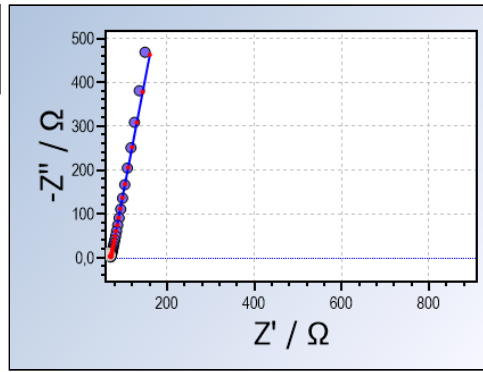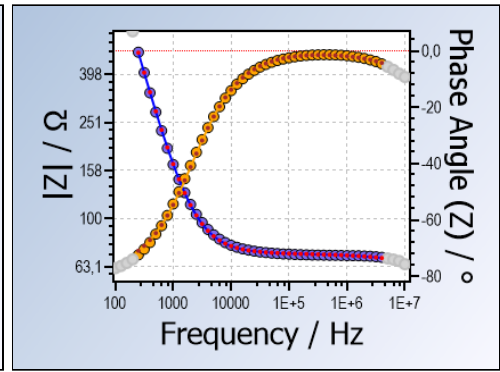

**FIT PARAMETERS:**

| Fix? | Name         | Value     | Error (Relative)        |
|------|--------------|-----------|-------------------------|
|      | Inductance 1 | 1,00E-015 | 1,54E-008 (1,54E+009 %) |
|      | Resistance 1 | 71,295237 | 0,1429274 (0,2004726 %) |
|      | CPE Q 1      | 6,66E-009 | 4,53E-009 (68,017968 %) |
|      | CPE Alpha 1  | 0,7089443 | 0,0412024 (5,8117960 %) |
|      | CPE Q 2      | 3,28E-006 | 4,27E-008 (1,3018989 %) |
|      | CPE Alpha 2  | 0,8788200 | 0,0015105 (0,1718759 %) |

**RelaxIS 3.0.20.16 - Report**



Datasource: 24.1C-2.6.txt\_1

Circuit: I-(R)(P)-P

| Type             | Value     |
|------------------|-----------|
| Temperature:     | 24,400000 |
| Free variable:   | 0,4000000 |
| DC Voltage:      | N/A       |
| AC Voltage:      | N/A       |
| Time:            | 46,219715 |
| Harmonic:        | N/A       |
| Free Variable 2: | N/A       |
| Area:            | N/A       |
| Thickness:       | N/A       |

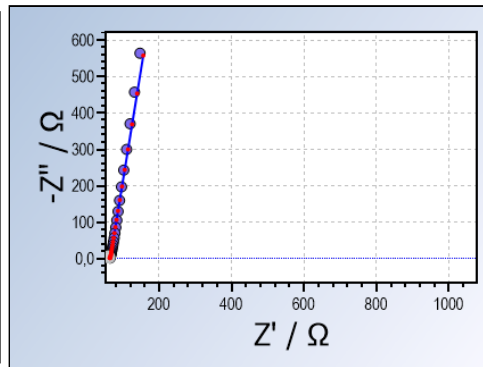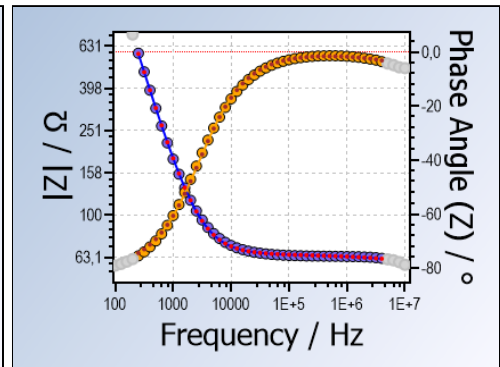

**FIT PARAMETERS:**

| Fix? | Name         | Value     | Error (Relative)        |
|------|--------------|-----------|-------------------------|
|      | Inductance 1 | 1,00E-015 | 1,81E-008 (1,81E+009 %) |
|      | Resistance 1 | 64,826002 | 0,1844264 (0,2844945 %) |
|      | CPE Q 1      | 5,49E-008 | 6,56E-008 (119,55468 %) |
|      | CPE Alpha 1  | 0,5785641 | 0,0737523 (12,747468 %) |
|      | CPE Q 2      | 2,39E-006 | 3,19E-008 (1,3309756 %) |
|      | CPE Alpha 2  | 0,8968802 | 0,0015361 (0,1712733 %) |

**RelaxIS 3.0.20.16 - Report**



Datasource: 24.1C-2.7.txt\_1

Circuit: I-(R)(P)-P

| Type           | Value     |
|----------------|-----------|
| Temperature:   | 24,400000 |
| Free variable: | 0,3000000 |
| DC Voltage:    | N/A       |
| AC Voltage:    | N/A       |
| Time:          | 46,060927 |
| Harmonic:      | N/A       |
| Free Variable  | N/A       |

2:  
 Area: N/A  
 Thickness: N/A

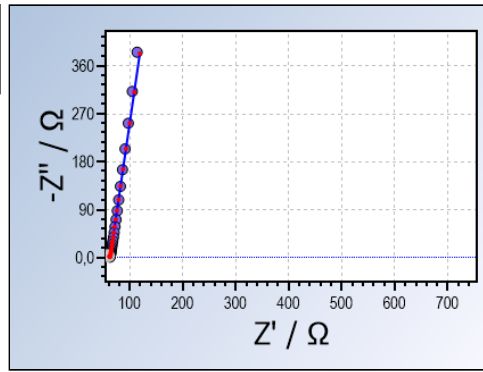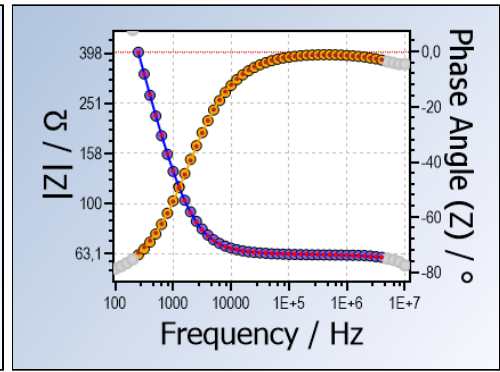

**FIT PARAMETERS:**

| Fix? Name    | Value     | Error (Relative)        |
|--------------|-----------|-------------------------|
| Inductance 1 | 1,00E-015 | 8,94E-009 (8,94E+008 %) |
| Resistance 1 | 62,880934 | 0,0777522 (0,1236499 %) |
| CPE Q 1      | 1,04E-008 | 6,87E-009 (66,267297 %) |
| CPE Alpha 1  | 0,6674171 | 0,0411665 (6,1680305 %) |
| CPE Q 2      | 3,23E-006 | 2,61E-008 (0,8082531 %) |
| CPE Alpha 2  | 0,9074794 | 0,0009436 (0,1039854 %) |

**RelaxIS 3.0.20.16 - Report**



Datasource: 24.1C-2.8.txt\_1

Circuit: I-(R)(P)-P

| Type             | Value     |
|------------------|-----------|
| Temperature:     | 24,400000 |
| Free variable:   | 0,2000000 |
| DC Voltage:      | N/A       |
| AC Voltage:      | N/A       |
| Time:            | 46,165715 |
| Harmonic:        | N/A       |
| Free Variable 2: | N/A       |
| Area:            | N/A       |
| Thickness:       | N/A       |

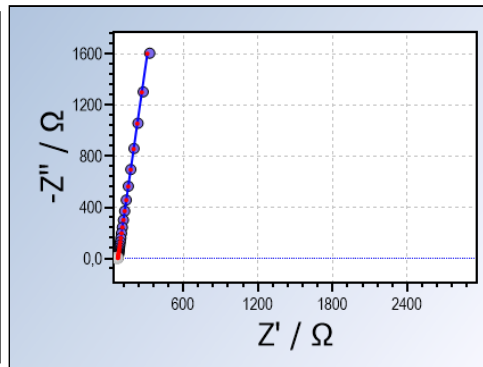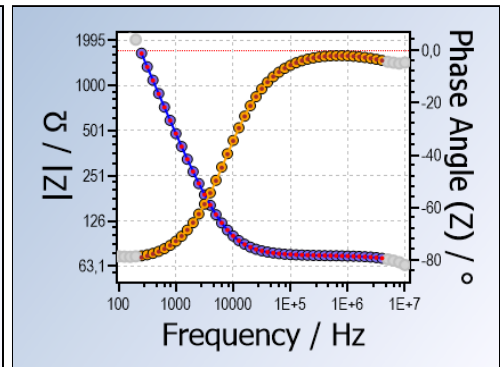

**FIT PARAMETERS:**

| Fix? Name    | Value     | Error (Relative)        |
|--------------|-----------|-------------------------|
| Inductance 1 | 1,60E-007 | 4,15E-008 (25,970847 %) |
| Resistance 1 | 74,291555 | 0,0556087 (0,0748520 %) |
| CPE Q 1      | 8,56E-010 | 3,45E-010 (40,314943 %) |
| CPE Alpha 1  | 0,8513287 | 0,0299101 (3,5133473 %) |
| CPE Q 2      | 7,79E-007 | 2,68E-009 (0,3441697 %) |
| CPE Alpha 2  | 0,9065378 | 0,0003747 (0,0413277 %) |

**RelaxIS 3.0.20.16 - Report**



Datasource: 24.1C-2.9.txt\_1

Circuit: I-(R)(P)-P

| Type           | Value     |
|----------------|-----------|
| Temperature:   | 24,400000 |
| Free variable: | 0,1000000 |
| DC Voltage:    | N/A       |
| AC Voltage:    | N/A       |
| Time:          | 46,342880 |
| Harmonic:      | N/A       |
| Free Variable  | N/A       |

2:  
 Area: N/A  
 Thickness: N/A

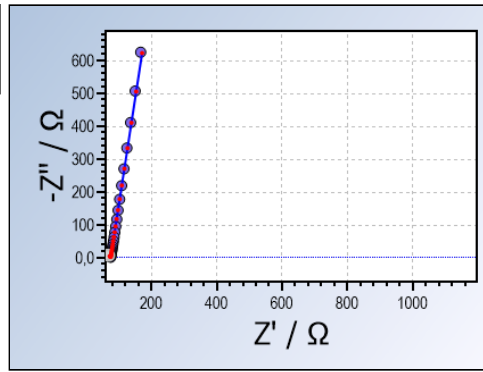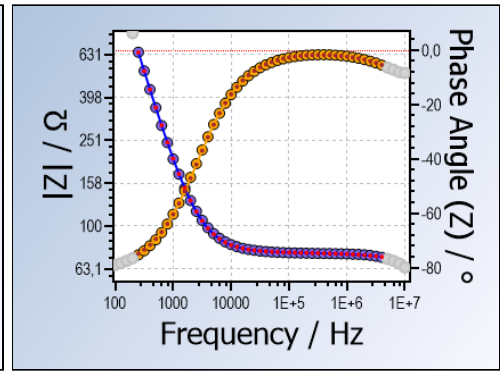

**FIT PARAMETERS:**

| Fix? | Name         | Value     | Error (Relative)        |
|------|--------------|-----------|-------------------------|
|      | Inductance 1 | 2,07E-008 | 4,71E-008 (226,92809 %) |
|      | Resistance 1 | 75,103975 | 0,0737709 (0,0982251 %) |
|      | CPE Q 1      | 3,20E-009 | 2,12E-009 (66,350376 %) |
|      | CPE Alpha 1  | 0,7641618 | 0,0468712 (6,1336687 %) |
|      | CPE Q 2      | 2,06E-006 | 1,17E-008 (0,5674122 %) |
|      | CPE Alpha 2  | 0,9024715 | 0,0006524 (0,0722937 %) |

**RelaxIS 3.0.20.16 - Report**



Datasource: 24.1C-3.0.txt\_1

Circuit: I-(R)(P)-P

| Type             | Value     |
|------------------|-----------|
| Temperature:     | 24,400000 |
| Free variable:   | 0,0       |
| DC Voltage:      | N/A       |
| AC Voltage:      | N/A       |
| Time:            | 46,249859 |
| Harmonic:        | N/A       |
| Free Variable 2: | N/A       |
| Area:            | N/A       |
| Thickness:       | N/A       |

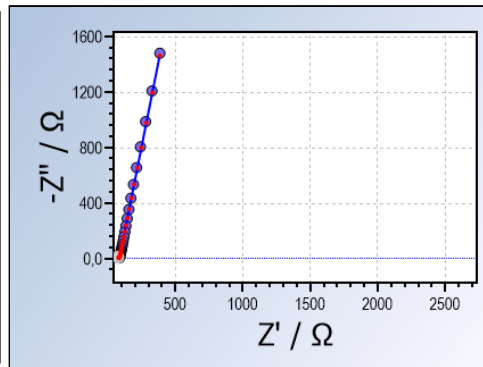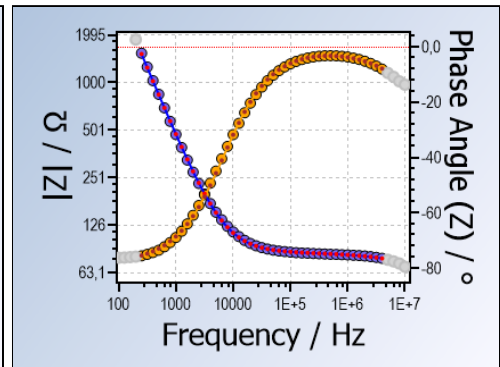

**FIT PARAMETERS:**

| Fix? | Name         | Value     | Error (Relative)        |
|------|--------------|-----------|-------------------------|
|      | Inductance 1 | 1,00E-015 | 8,38E-009 (8,38E+008 %) |
|      | Resistance 1 | 83,720064 | 0,1783436 (0,2130237 %) |
|      | CPE Q 1      | 1,19E-008 | 3,85E-009 (32,419692 %) |
|      | CPE Alpha 1  | 0,7037244 | 0,0191772 (2,7251038 %) |
|      | CPE Q 2      | 1,09E-006 | 1,01E-008 (0,9323310 %) |
|      | CPE Alpha 2  | 0,8718125 | 0,0010248 (0,1175444 %) |

**RelaxIS 3.0.20.16 - Report**



Datasource: -0.6\_3.0\_1

Circuit: I-(R)(P)-P

| Type           | Value     |
|----------------|-----------|
| Temperature:   | -0,600000 |
| Free variable: | 0,0       |
| DC Voltage:    | N/A       |
| AC Voltage:    | N/A       |
| Time:          | 46,748366 |
| Harmonic:      | N/A       |
| Free Variable  | N/A       |

2:  
 Area: N/A  
 Thickness: N/A

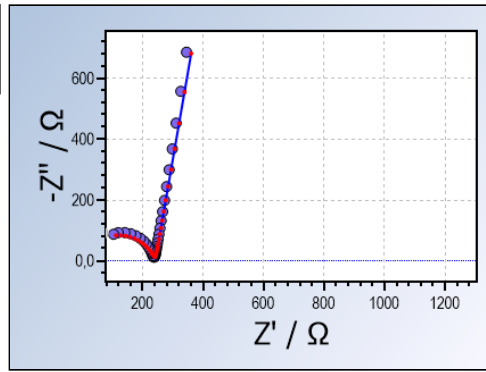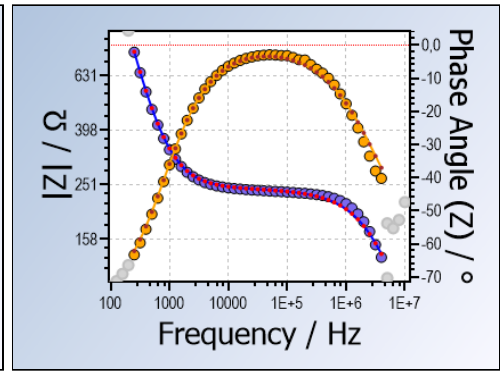

**FIT PARAMETERS:**

| Fix? | Name         | Value     | Error (Relative)        |
|------|--------------|-----------|-------------------------|
|      | Inductance 1 | 1,00E-015 | 5,13E-007 (5,13E+010 %) |
|      | Resistance 1 | 241,80371 | 1,3052968 (0,5398167 %) |
|      | CPE Q 1      | 8,23E-009 | 1,51E-009 (18,281902 %) |
|      | CPE Alpha 1  | 0,7766212 | 0,0110124 (1,4179919 %) |
|      | CPE Q 2      | 2,05E-006 | 1,07E-007 (5,1983701 %) |
|      | CPE Alpha 2  | 0,8903343 | 0,0062782 (0,7051518 %) |

**RelaxIS 3.0.20.16 - Report**



Datasource: -0.6C\_2.5\_1

Circuit: I-(R)(P)-P

| Type             | Value     |
|------------------|-----------|
| Temperature:     | -0,600000 |
| Free variable:   | 0,5000000 |
| DC Voltage:      | N/A       |
| AC Voltage:      | N/A       |
| Time:            | 46,176039 |
| Harmonic:        | N/A       |
| Free Variable 2: | N/A       |
| Area:            | N/A       |
| Thickness:       | N/A       |

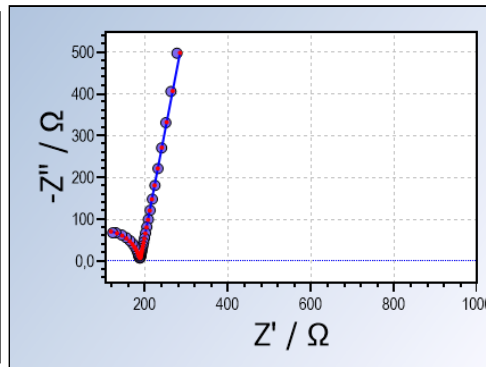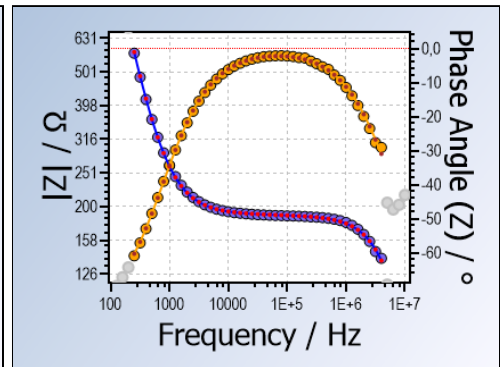

**FIT PARAMETERS:**

| Fix? | Name         | Value     | Error (Relative)        |
|------|--------------|-----------|-------------------------|
|      | Inductance 1 | 2,06E-007 | 4,75E-008 (23,128435 %) |
|      | Resistance 1 | 188,27540 | 0,2684620 (0,1425900 %) |
|      | CPE Q 1      | 1,02E-009 | 1,18E-010 (11,577141 %) |
|      | CPE Alpha 1  | 0,8899234 | 0,0072642 (0,8162765 %) |
|      | CPE Q 2      | 3,05E-006 | 4,58E-008 (1,5017142 %) |
|      | CPE Alpha 2  | 0,8786996 | 0,0018150 (0,2065583 %) |

**RelaxIS 3.0.20.16 - Report**

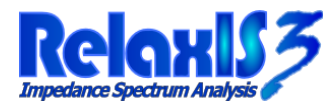

Datasource: -0.6C\_2.6\_1

Circuit: I-(R)(P)-P

| Type           | Value     |
|----------------|-----------|
| Temperature:   | -0,600000 |
| Free variable: | 0,4000000 |
| DC Voltage:    | N/A       |
| AC Voltage:    | N/A       |
| Time:          | 46,176184 |
| Harmonic:      | N/A       |
| Free Variable  | N/A       |

2:  
 Area: N/A  
 Thickness: N/A

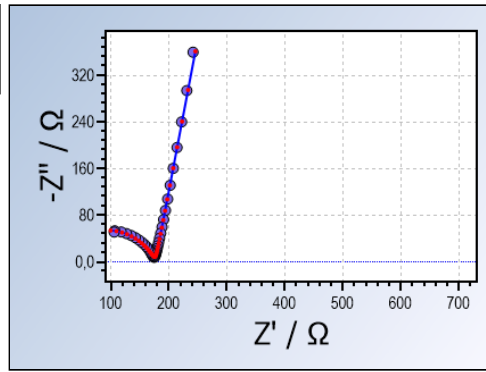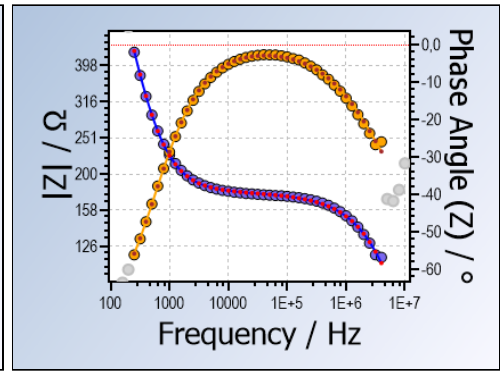

**FIT PARAMETERS:**

| Fix? | Name         | Value     | Error (Relative)        |
|------|--------------|-----------|-------------------------|
|      | Inductance 1 | 1,02E-007 | 4,73E-008 (46,417010 %) |
|      | Resistance 1 | 176,90427 | 0,4025224 (0,2275368 %) |
|      | CPE Q 1      | 1,88E-008 | 2,66E-009 (14,126941 %) |
|      | CPE Alpha 1  | 0,7299693 | 0,0087436 (1,1977983 %) |
|      | CPE Q 2      | 4,17E-006 | 1,01E-007 (2,4185780 %) |
|      | CPE Alpha 2  | 0,8800695 | 0,0029718 (0,3376771 %) |

**RelaxIS 3.0.20.16 - Report**



Datasource: -0.6C\_2.7\_1

Circuit: I-(R)(P)-P

| Type             | Value     |
|------------------|-----------|
| Temperature:     | -0,600000 |
| Free variable:   | 0,3000000 |
| DC Voltage:      | N/A       |
| AC Voltage:      | N/A       |
| Time:            | 46,256760 |
| Harmonic:        | N/A       |
| Free Variable 2: | N/A       |
| Area:            | N/A       |
| Thickness:       | N/A       |

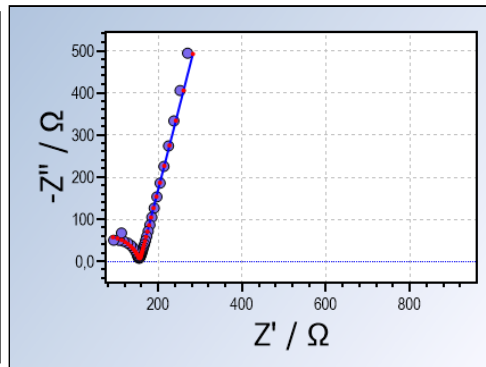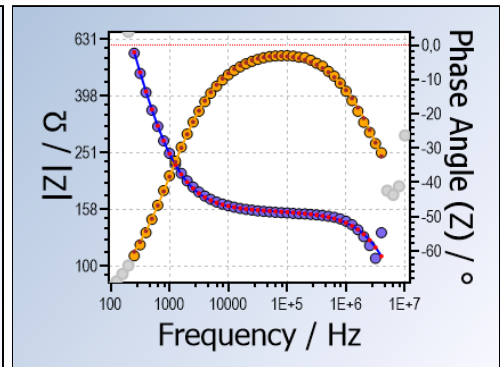

**FIT PARAMETERS:**

| Fix? | Name         | Value     | Error (Relative)        |
|------|--------------|-----------|-------------------------|
|      | Inductance 1 | 1,00E-015 | 4,09E-008 (4,09E+009 %) |
|      | Resistance 1 | 155,76285 | 0,9486415 (0,6090294 %) |
|      | CPE Q 1      | 3,94E-009 | 1,09E-009 (27,570947 %) |
|      | CPE Alpha 1  | 0,8263724 | 0,0167783 (2,0303507 %) |
|      | CPE Q 2      | 4,05E-006 | 2,23E-007 (5,5012682 %) |
|      | CPE Alpha 2  | 0,8396786 | 0,0065930 (0,7851763 %) |

**RelaxIS 3.0.20.16 - Report**



Datasource: -0.6C\_2.8\_1

Circuit: I-(R)(P)-P

| Type           | Value     |
|----------------|-----------|
| Temperature:   | -0,600000 |
| Free variable: | 0,2000000 |
| DC Voltage:    | N/A       |
| AC Voltage:    | N/A       |
| Time:          | 46,227117 |
| Harmonic:      | N/A       |
| Free Variable  | N/A       |

2:  
 Area: N/A  
 Thickness: N/A

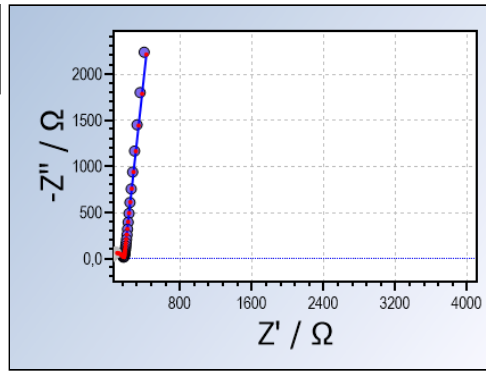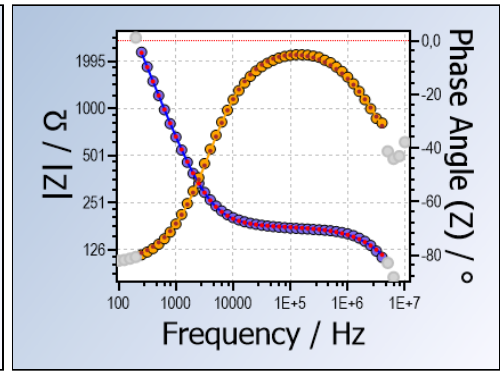

**FIT PARAMETERS:**

| Fix? | Name         | Value     | Error (Relative)        |
|------|--------------|-----------|-------------------------|
|      | Inductance 1 | 1,02E-015 | 0,0 (0,0 %)             |
|      | Resistance 1 | 176,68958 | 0,5435396 (0,3076240 %) |
|      | CPE Q 1      | 8,08E-009 | 9,57E-010 (11,850300 %) |
|      | CPE Alpha 1  | 0,7800831 | 0,0071070 (0,9110626 %) |
|      | CPE Q 2      | 4,80E-007 | 8,24E-009 (1,7185936 %) |
|      | CPE Alpha 2  | 0,9289853 | 0,0019298 (0,2077344 %) |

**RelaxIS 3.0.20.16 - Report**



Datasource: -0.6C\_2.9\_1

Circuit: I-(R)(P)-P

| Type             | Value     |
|------------------|-----------|
| Temperature:     | -0,600000 |
| Free variable:   | 0,1000000 |
| DC Voltage:      | N/A       |
| AC Voltage:      | N/A       |
| Time:            | 45,917583 |
| Harmonic:        | N/A       |
| Free Variable 2: | N/A       |
| Area:            | N/A       |
| Thickness:       | N/A       |

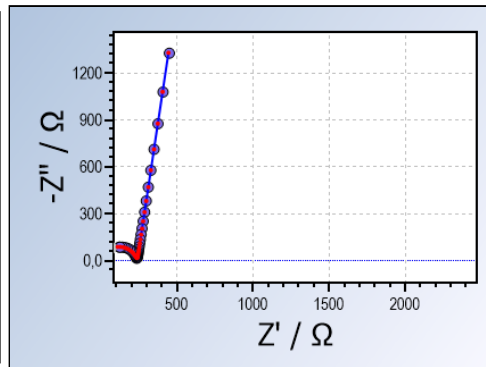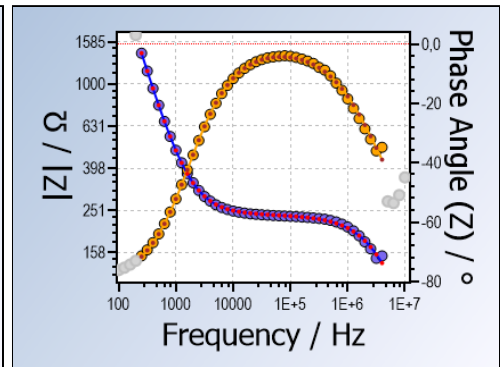

**FIT PARAMETERS:**

| Fix? | Name         | Value     | Error (Relative)        |
|------|--------------|-----------|-------------------------|
|      | Inductance 1 | 1,08E-015 | 0,0 (0,0 %)             |
|      | Resistance 1 | 239,02485 | 0,8937769 (0,3739263 %) |
|      | CPE Q 1      | 4,40E-009 | 5,54E-010 (12,589645 %) |
|      | CPE Alpha 1  | 0,8140416 | 0,0075962 (0,9331465 %) |
|      | CPE Q 2      | 9,64E-007 | 2,68E-008 (2,7829441 %) |
|      | CPE Alpha 2  | 0,9026835 | 0,0032526 (0,3603283 %) |

**RelaxIS 3.0.20.16 - Report**



Datasource: -9.4C\_2.5\_1

Circuit: I-(R)(P)-P

| Type           | Value     |
|----------------|-----------|
| Temperature:   | -9,400000 |
| Free variable: | 0,5000000 |
| DC Voltage:    | N/A       |
| AC Voltage:    | N/A       |
| Time:          | 46,097719 |
| Harmonic:      | N/A       |
| Free Variable  | N/A       |



2:  
 Area: N/A  
 Thickness: N/A

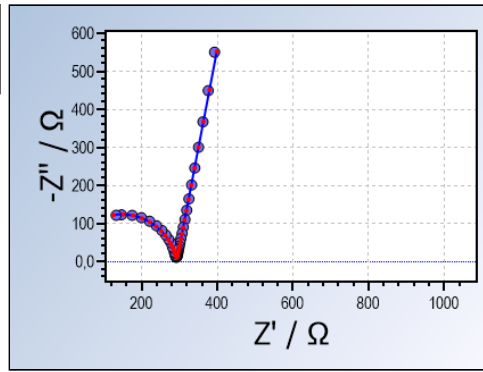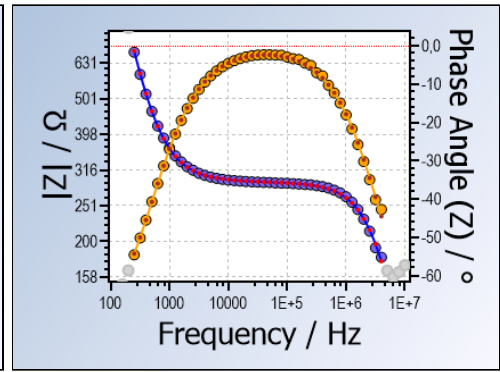

**FIT PARAMETERS:**

| Fix? | Name         | Value     | Error (Relative)        |
|------|--------------|-----------|-------------------------|
|      | Inductance 1 | 1,00E-015 | 0,0 (0,0 %)             |
|      | Resistance 1 | 292,45593 | 0,4317291 (0,1476219 %) |
|      | CPE Q 1      | 9,13E-010 | 4,70E-011 (5,1540689 %) |
|      | CPE Alpha 1  | 0,8982904 | 0,0031124 (0,3464852 %) |
|      | CPE Q 2      | 2,74E-006 | 5,14E-008 (1,8747731 %) |
|      | CPE Alpha 2  | 0,8791726 | 0,0022958 (0,2611363 %) |

**RelaxIS 3.0.20.16 - Report**



Datasource: -9.4C\_2.6\_1

Circuit: I-(R)(P)-P

| Type             | Value     |
|------------------|-----------|
| Temperature:     | -9,400000 |
| Free variable:   | 0,4000000 |
| DC Voltage:      | N/A       |
| AC Voltage:      | N/A       |
| Time:            | 46,297645 |
| Harmonic:        | N/A       |
| Free Variable 2: | N/A       |
| Area:            | N/A       |
| Thickness:       | N/A       |

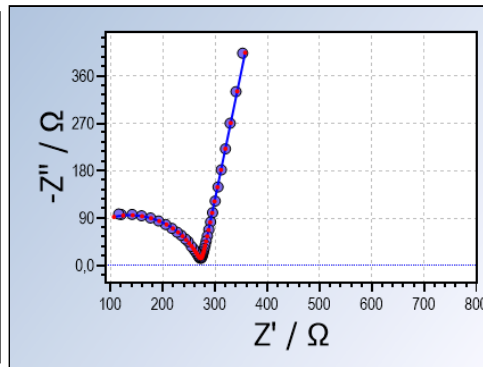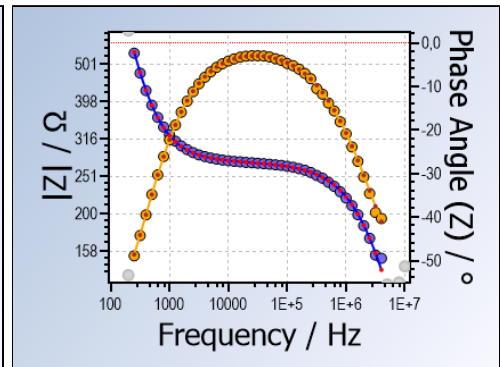

**FIT PARAMETERS:**

| Fix? | Name         | Value     | Error (Relative)        |
|------|--------------|-----------|-------------------------|
|      | Inductance 1 | 1,00E-015 | 0,0 (0,0 %)             |
|      | Resistance 1 | 274,00456 | 0,6289400 (0,2295363 %) |
|      | CPE Q 1      | 8,95E-009 | 6,08E-010 (6,7957101 %) |
|      | CPE Alpha 1  | 0,7762315 | 0,0041179 (0,5305023 %) |
|      | CPE Q 2      | 3,98E-006 | 1,24E-007 (3,1024220 %) |
|      | CPE Alpha 2  | 0,8704399 | 0,0038453 (0,4417653 %) |

**RelaxIS 3.0.20.16 - Report**



Datasource: -9.4C\_2.7\_1

Circuit: I-(R)(P)-P

| Type           | Value     |
|----------------|-----------|
| Temperature:   | -9,400000 |
| Free variable: | 0,3000000 |
| DC Voltage:    | N/A       |
| AC Voltage:    | N/A       |
| Time:          | 46,692992 |
| Harmonic:      | N/A       |
| Free Variable  | N/A       |

2:  
 Area: N/A  
 Thickness: N/A

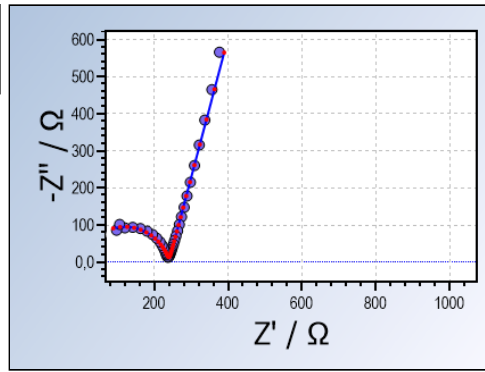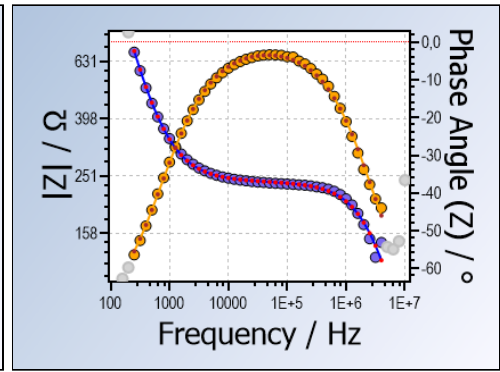

**FIT PARAMETERS:**

| Fix? | Name         | Value     | Error (Relative)        |
|------|--------------|-----------|-------------------------|
|      | Inductance 1 | 1,00E-015 | 0,0 (0,0 %)             |
|      | Resistance 1 | 239,22290 | 1,2501174 (0,5225743 %) |
|      | CPE Q 1      | 2,59E-009 | 4,01E-010 (15,469975 %) |
|      | CPE Alpha 1  | 0,8580417 | 0,0093656 (1,0915071 %) |
|      | CPE Q 2      | 3,66E-006 | 2,01E-007 (5,4984057 %) |
|      | CPE Alpha 2  | 0,8347487 | 0,0066739 (0,7995089 %) |

**RelaxIS 3.0.20.16 - Report**



Datasource: -9.4C\_2.8\_1

Circuit: I-(R)(P)-P

| Type             | Value     |
|------------------|-----------|
| Temperature:     | -9,400000 |
| Free variable:   | 0,2000000 |
| DC Voltage:      | N/A       |
| AC Voltage:      | N/A       |
| Time:            | 47,345180 |
| Harmonic:        | N/A       |
| Free Variable 2: | N/A       |
| Area:            | N/A       |
| Thickness:       | N/A       |

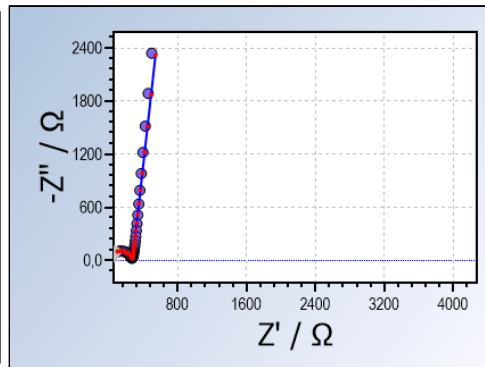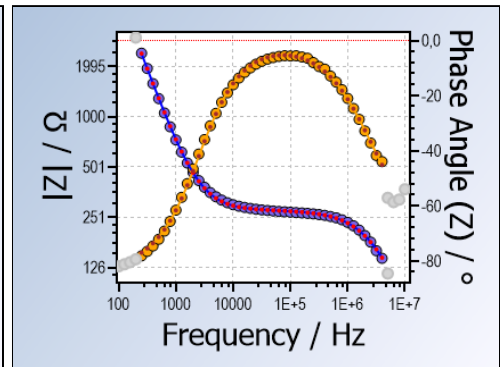

**FIT PARAMETERS:**

| Fix? | Name         | Value     | Error (Relative)        |
|------|--------------|-----------|-------------------------|
|      | Inductance 1 | 1,27E-015 | 2,84E-008 (2,24E+009 %) |
|      | Resistance 1 | 276,18590 | 0,7390413 (0,2675884 %) |
|      | CPE Q 1      | 3,34E-009 | 2,70E-010 (8,0814318 %) |
|      | CPE Alpha 1  | 0,8354246 | 0,0048844 (0,5846587 %) |
|      | CPE Q 2      | 4,64E-007 | 8,09E-009 (1,7429452 %) |
|      | CPE Alpha 2  | 0,9271409 | 0,0019988 (0,2155881 %) |

**RelaxIS 3.0.20.16 - Report**



Datasource: -9.4C\_2.9\_1

Circuit: I-(R)(P)-P

| Type           | Value     |
|----------------|-----------|
| Temperature:   | -9,400000 |
| Free variable: | 0,1000000 |
| DC Voltage:    | N/A       |
| AC Voltage:    | N/A       |
| Time:          | 47,531299 |
| Harmonic:      | N/A       |
| Free Variable  | N/A       |

2:  
 Area: N/A  
 Thickness: N/A

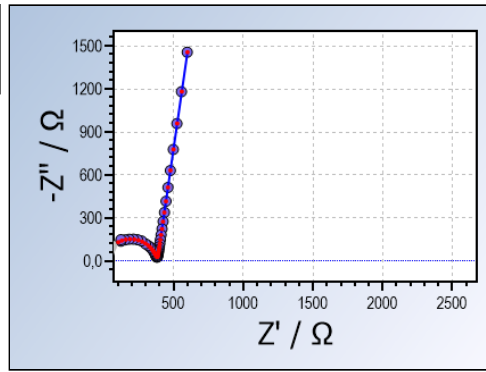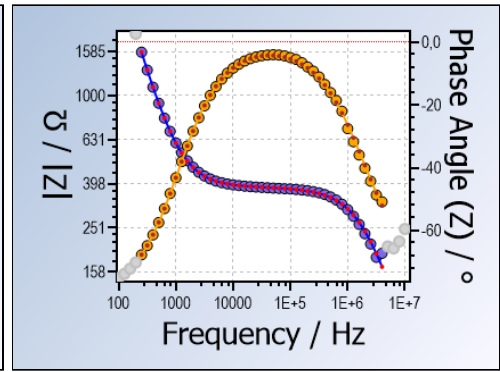

**FIT PARAMETERS:**

| Fix? | Name         | Value     | Error (Relative)        |
|------|--------------|-----------|-------------------------|
|      | Inductance 1 | 1,03E-015 | 4,95E-008 (4,79E+009 %) |
|      | Resistance 1 | 383,61074 | 1,6451557 (0,4288607 %) |
|      | CPE Q 1      | 2,22E-009 | 2,46E-010 (11,122863 %) |
|      | CPE Alpha 1  | 0,8568571 | 0,0068511 (0,7995567 %) |
|      | CPE Q 2      | 8,57E-007 | 3,21E-008 (3,7401568 %) |
|      | CPE Alpha 2  | 0,9063191 | 0,0044564 (0,4917003 %) |

**RelaxIS 3.0.20.16 - Report**



Datasource: -9.4C\_3.0\_1

Circuit: I-(R)(P)-P

| Type             | Value     |
|------------------|-----------|
| Temperature:     | -9,400000 |
| Free variable:   | 0,0       |
| DC Voltage:      | N/A       |
| AC Voltage:      | N/A       |
| Time:            | 46,651920 |
| Harmonic:        | N/A       |
| Free Variable 2: | N/A       |
| Area:            | N/A       |
| Thickness:       | N/A       |

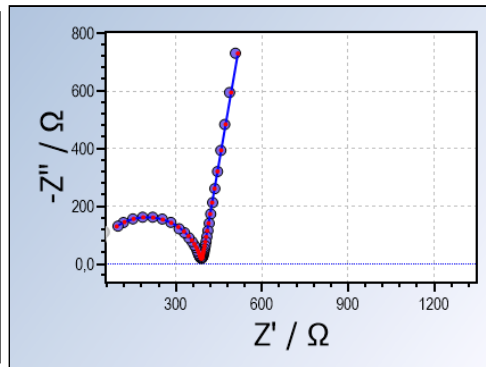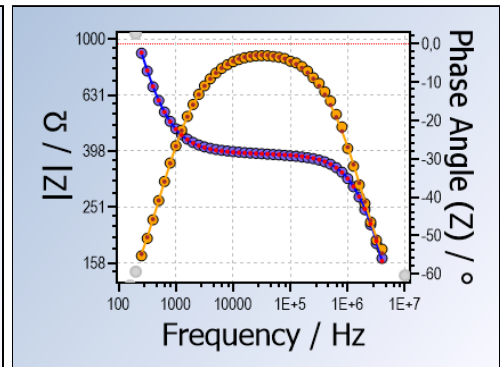

**FIT PARAMETERS:**

| Fix? | Name         | Value     | Error (Relative)        |
|------|--------------|-----------|-------------------------|
|      | Inductance 1 | 2,74E-007 | 4,30E-008 (15,685817 %) |
|      | Resistance 1 | 388,98719 | 0,6185480 (0,1590150 %) |
|      | CPE Q 1      | 1,10E-009 | 5,45E-011 (4,9455400 %) |
|      | CPE Alpha 1  | 0,9002115 | 0,0029777 (0,3307794 %) |
|      | CPE Q 2      | 1,91E-006 | 3,82E-008 (2,0014461 %) |
|      | CPE Alpha 2  | 0,8906429 | 0,0024549 (0,2756335 %) |

**RelaxIS 3.0.20.16 - Report**



Datasource: 9.5C\_2.5\_1

Circuit: I-(R)(P)-P

| Type           | Value     |
|----------------|-----------|
| Temperature:   | 9,5000000 |
| Free variable: | 0,5000000 |
| DC Voltage:    | N/A       |
| AC Voltage:    | N/A       |
| Time:          | 46,548714 |
| Harmonic:      | N/A       |
| Free Variable  | N/A       |

2:  
 Area: N/A  
 Thickness: N/A

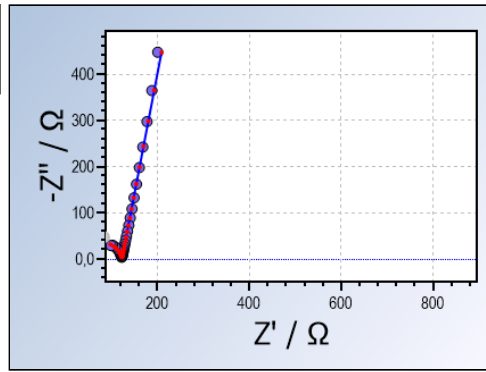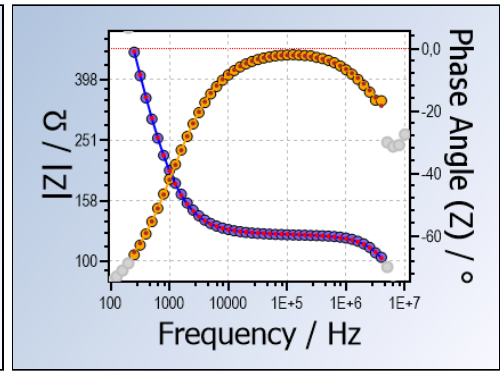

**FIT PARAMETERS:**

| Fix? | Name         | Value     | Error (Relative)        |
|------|--------------|-----------|-------------------------|
|      | Inductance 1 | 3,12E-007 | 4,85E-008 (15,557147 %) |
|      | Resistance 1 | 122,70396 | 0,1729726 (0,1409674 %) |
|      | CPE Q 1      | 1,05E-009 | 2,01E-010 (19,111966 %) |
|      | CPE Alpha 1  | 0,8842298 | 0,0124526 (1,4083013 %) |
|      | CPE Q 2      | 3,39E-006 | 4,32E-008 (1,2739076 %) |
|      | CPE Alpha 2  | 0,8789942 | 0,0015177 (0,1726625 %) |

**RelaxIS 3.0.20.16 - Report**



Datasource: 9.5C\_2.6\_1

Circuit: I-(R)(P)-P

| Type             | Value     |
|------------------|-----------|
| Temperature:     | 9,5000000 |
| Free variable:   | 0,4000000 |
| DC Voltage:      | N/A       |
| AC Voltage:      | N/A       |
| Time:            | 46,291028 |
| Harmonic:        | N/A       |
| Free Variable 2: | N/A       |
| Area:            | N/A       |
| Thickness:       | N/A       |

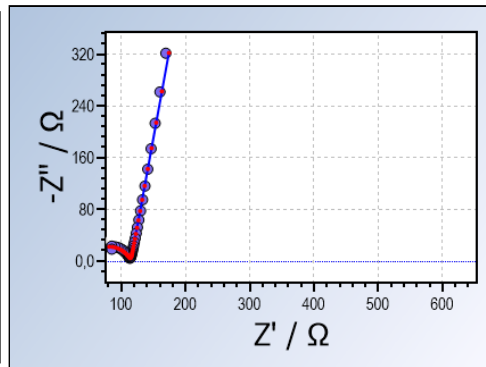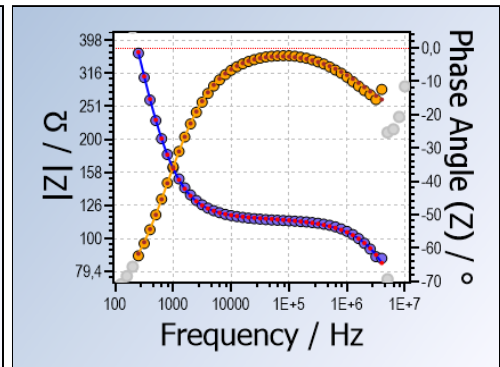

**FIT PARAMETERS:**

| Fix? | Name         | Value     | Error (Relative)        |
|------|--------------|-----------|-------------------------|
|      | Inductance 1 | 3,86E-007 | 5,06E-008 (13,122944 %) |
|      | Resistance 1 | 115,04440 | 0,2980508 (0,2590746 %) |
|      | CPE Q 1      | 2,09E-008 | 5,39E-009 (25,744107 %) |
|      | CPE Alpha 1  | 0,7223598 | 0,0162416 (2,2484131 %) |
|      | CPE Q 2      | 4,52E-006 | 1,05E-007 (2,3199167 %) |
|      | CPE Alpha 2  | 0,8847689 | 0,0028145 (0,3181086 %) |

**RelaxIS 3.0.20.16 - Report**



Datasource: 9.5C\_2.7\_1

Circuit: I-(R)(P)-P

| Type           | Value     |
|----------------|-----------|
| Temperature:   | 9,5000000 |
| Free variable: | 0,3000000 |
| DC Voltage:    | N/A       |
| AC Voltage:    | N/A       |
| Time:          | 46,240626 |
| Harmonic:      | N/A       |
| Free Variable  | N/A       |

2:  
 Area: N/A  
 Thickness: N/A

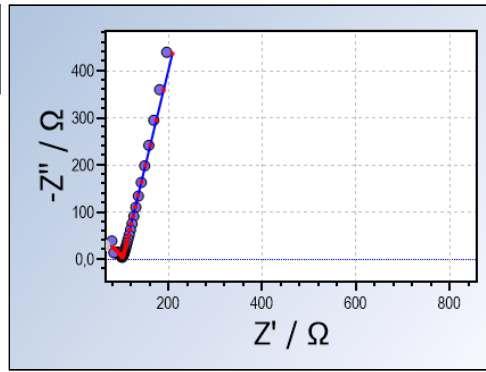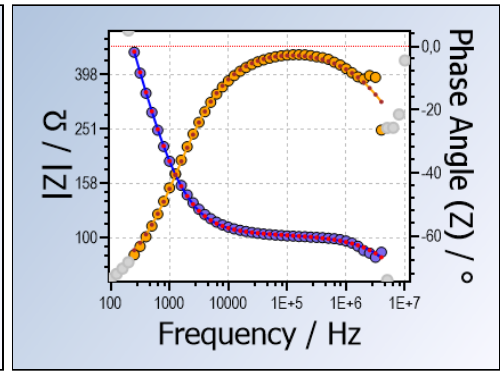

**FIT PARAMETERS:**

| Fix? | Name         | Value     | Error (Relative)        |
|------|--------------|-----------|-------------------------|
|      | Inductance 1 | 1,00E-015 | 1,14E-008 (1,14E+009 %) |
|      | Resistance 1 | 102,24951 | 0,6699106 (0,6551724 %) |
|      | CPE Q 1      | 1,18E-008 | 6,35E-009 (53,990968 %) |
|      | CPE Alpha 1  | 0,7453302 | 0,0328571 (4,4083992 %) |
|      | CPE Q 2      | 4,32E-006 | 2,15E-007 (4,9761717 %) |
|      | CPE Alpha 2  | 0,8479590 | 0,0058907 (0,6946893 %) |

**RelaxIS 3.0.20.16 - Report**



Datasource: 9.5C\_2.8\_1

Circuit: I-(R)(P)-P

| Type             | Value     |
|------------------|-----------|
| Temperature:     | 9,5000000 |
| Free variable:   | 0,2000000 |
| DC Voltage:      | N/A       |
| AC Voltage:      | N/A       |
| Time:            | 46,772638 |
| Harmonic:        | N/A       |
| Free Variable 2: | N/A       |
| Area:            | N/A       |
| Thickness:       | N/A       |

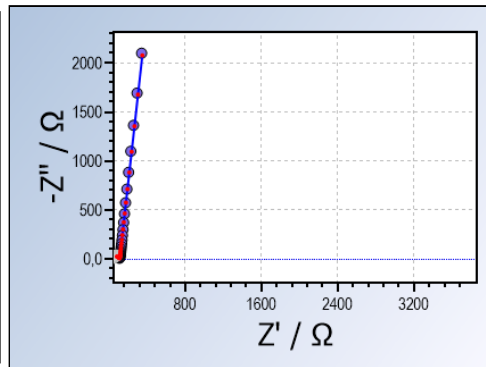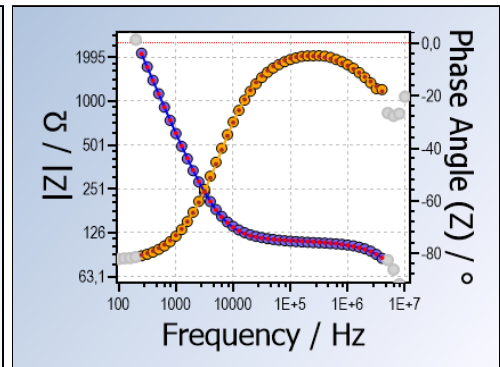

**FIT PARAMETERS:**

| Fix? | Name         | Value     | Error (Relative)        |
|------|--------------|-----------|-------------------------|
|      | Inductance 1 | 2,66E-007 | 5,00E-008 (18,760023 %) |
|      | Resistance 1 | 111,10443 | 0,2960082 (0,2664234 %) |
|      | CPE Q 1      | 8,74E-009 | 2,29E-009 (26,180604 %) |
|      | CPE Alpha 1  | 0,7736896 | 0,0165704 (2,1417409 %) |
|      | CPE Q 2      | 5,16E-007 | 6,39E-009 (1,2372200 %) |
|      | CPE Alpha 2  | 0,9274972 | 0,0013629 (0,1469436 %) |

**RelaxIS 3.0.20.16 - Report**



Datasource: 9.5C\_2.9\_1

Circuit: I-(R)(P)-P

| Type           | Value     |
|----------------|-----------|
| Temperature:   | 9,5000000 |
| Free variable: | 0,1000000 |
| DC Voltage:    | N/A       |
| AC Voltage:    | N/A       |
| Time:          | 46,462219 |
| Harmonic:      | N/A       |
| Free Variable  | N/A       |

2:  
 Area: N/A  
 Thickness: N/A

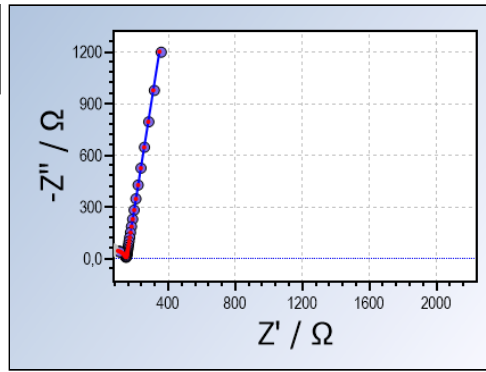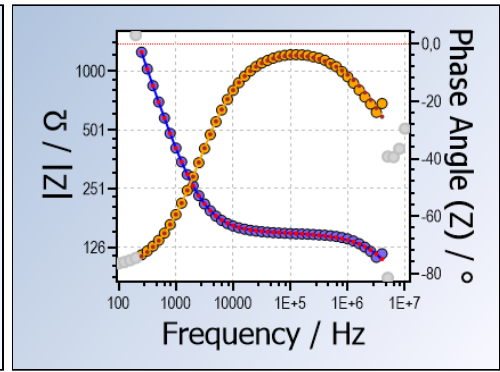

**FIT PARAMETERS:**

| Fix? | Name         | Value     | Error (Relative)        |
|------|--------------|-----------|-------------------------|
|      | Inductance 1 | 9,16E-008 | 9,59E-008 (104,73857 %) |
|      | Resistance 1 | 149,53717 | 0,6049274 (0,4045331 %) |
|      | CPE Q 1      | 6,59E-009 | 2,25E-009 (34,095464 %) |
|      | CPE Alpha 1  | 0,7850803 | 0,0214311 (2,7297936 %) |
|      | CPE Q 2      | 1,11E-006 | 2,76E-008 (2,4790773 %) |
|      | CPE Alpha 2  | 0,8966281 | 0,0028477 (0,3175958 %) |

**RelaxIS 3.0.20.16 - Report**



Datasource: 9.5C\_3.0\_1

Circuit: I-(R)(P)-P

| Type             | Value     |
|------------------|-----------|
| Temperature:     | 9,5000000 |
| Free variable:   | 0,0       |
| DC Voltage:      | N/A       |
| AC Voltage:      | N/A       |
| Time:            | 47,961785 |
| Harmonic:        | N/A       |
| Free Variable 2: | N/A       |
| Area:            | N/A       |
| Thickness:       | N/A       |

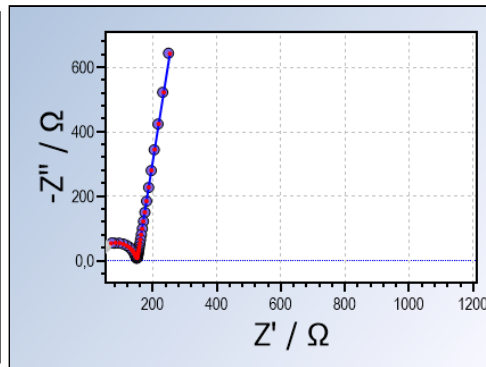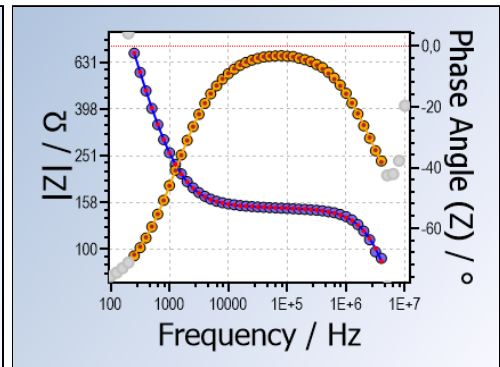

**FIT PARAMETERS:**

| Fix? | Name         | Value     | Error (Relative)        |
|------|--------------|-----------|-------------------------|
|      | Inductance 1 | 3,63E-007 | 2,48E-008 (6,8482922 %) |
|      | Resistance 1 | 150,54455 | 0,2131289 (0,1415720 %) |
|      | CPE Q 1      | 1,64E-009 | 1,23E-010 (7,4774335 %) |
|      | CPE Alpha 1  | 0,8979396 | 0,0045826 (0,5103492 %) |
|      | CPE Q 2      | 2,04E-006 | 2,49E-008 (1,2208364 %) |
|      | CPE Alpha 2  | 0,8991354 | 0,0014441 (0,1606067 %) |
