# Supplementary material for: Re-investigating the structure–property relationship of the solid electrolytes Li 3− x In 1− x Zr x Cl 6 and the impact of In–Zr( iv ) substitution
Source: Royal Society of Chemistry journal article supplement (doi:10.1039/d2ta08433c), 2023-01-01
Supplement: d2ta08433c3.zip [file AC-Impedance_error_calculation.xlsx]

## Sheet: Sheet1
Room temperature measurement
x	R [Ohm]	dR [Ohm]	thickness [cm]	dthickness [cm]	A [cm2]	sigma [S/cm]	dsigma/sigma [%]	dsigma [S/cm]
0.5	71.9	0.1429	0.1	0.005	0.785398	0.00177085	0.0500395	8.86123e-05
0.4	64.8	0.1844	0.1	0.005	0.785398	0.00196488	0.0500809	9.84028e-05
0.3	62.88	0.0777	0.1	0.005	0.785398	0.00202487	0.0500153	0.000101275
0.2	74.29	0.0556	0.1	0.005	0.785398	0.00171388	0.0500056	8.57035e-05
0.1	75.1	0.0738	0.1	0.005	0.785398	0.00169539	0.0500097	8.4786e-05
0	83.72	0.1783	0.1	0.005	0.785398	0.00152083	0.0500453	7.61105e-05
Arrhenius Relationship
x	E_Activation	ΔE_Activation	ΔE_Activation,rel / %	Pre-exp. Fac.	ΔPre-exp. Fac.	ΔPre-exp. Fac.,rel / %	E_Activation [eV]	dEa [eV]	R² (linear)	R² (nonlinear)
0.5	-27274.1	906.003	3.32185	0.00116762	0.000467261	40.0184	-0.282713	-0.00939131	0.99266	0.996253
0.4	-27942.6	668.908	2.39386	0.000806137	0.000238438	29.5778	-0.289644	-0.00693366	0.996254	0.998048
0.3	-26722.9	1023.05	3.82838	0.00123354	0.000556897	45.1464	-0.277	-0.0106046	0.990163	0.995037
0.2	-28695.6	767.568	2.67486	0.000571388	0.000194582	34.0543	-0.297449	-0.00795635	0.996883	0.998484
0.1	-32613	716.136	2.19586	0.000132743	4.23002e-05	31.8663	-0.338055	-0.00742321	0.997192	0.998371
0	-29556.9	1880.73	6.36307	0.000553599	0.000462298	83.5077	-0.306377	-0.019495	0.981876	0.990136
